# Supplementary material for: Economic Modelling of Chronic Kidney Disease: A Systematic Literature Review to Inform Conceptual Model Design
Source: PubMed Central journal article supplement — Pharmacoeconomics. 2019 Sep 30;37(12):1451–68. doi: 10.1007/s40273-019-00835-z (PMC6892339; doi:10.1007/s40273-019-00835-z), 2019-09-30
Supplement: 40273_2019_835_MOESM5_ESM.pdf [file 40273_2019_835_MOESM5_ESM.pdf]

**ECONOMIC MODELLING OF CHRONIC KIDNEY DISEASE: A SYSTEMATIC LITERATURE  
REVIEW TO INFORM CONCEPTUAL MODEL DESIGN**

Daniel M Sugrue<sup>1</sup>, Thomas Ward<sup>1</sup>, Sukhviri Rai<sup>1</sup>, Phil McEwan<sup>1</sup>, Heleen GM van Haalen<sup>2</sup>

<sup>1</sup>Health Economics and Outcomes Research Limited, Cardiff, UK

<sup>2</sup>Global Health Economics, AstraZeneca, Gothenburg, Sweden

**Corresponding author**

Daniel M Sugrue

Health Economics and Outcomes Research Ltd

Rhymney House, Unit A Copse Walk, Cardiff Gate Business Park, Cardiff CF23 8RB

Email: [daniel.sugrue@heor.co.uk](mailto:daniel.sugrue@heor.co.uk)

Tel: +44 (0) 2920 399 146

## Online Resource 5

**Supplementary Table 11. Summary of unique models: Model setting**

| Study                              | Year | Country     | Perspective                       | Time horizon   | Type of analysis                        | Model type                      | Disease setting        | Research question                                                                                                                                                                                                                                                                         |
|------------------------------------|------|-------------|-----------------------------------|----------------|-----------------------------------------|---------------------------------|------------------------|-------------------------------------------------------------------------------------------------------------------------------------------------------------------------------------------------------------------------------------------------------------------------------------------|
| Adarkwah et al. <sup>1</sup>       | 2011 | Germany     | German statutory health insurance | 57 years       | Cost-effectiveness                      | Markov model                    | Advanced renal disease | Cost-effectiveness of ACEI therapy in nondiabetic proteinuric patients with advanced renal disease                                                                                                                                                                                        |
| Adarkwah et al. <sup>2</sup>       | 2013 | Netherlands | Healthcare payer                  | Lifetime       | Cost-utility                            | Markov model                    | Advanced renal disease | Cost-effectiveness of ACEI therapy in nondiabetic proteinuric patients with advanced renal disease                                                                                                                                                                                        |
| Beby et al. <sup>3</sup>           | 2016 | Netherlands | Payer                             | 5 years        | Cost-effectiveness                      | Markov model                    | ESRD                   | Cost-effectiveness of high dose haemodialysis, both in-center and at home, in comparison to conventional in- centre haemodialysis                                                                                                                                                         |
| Clement et al. <sup>4</sup>        | 2010 | Canada      | Healthcare payer                  | Lifetime       | Cost-utility                            | Markov model                    | Anaemic CKD            | Cost-effectiveness of treating anaemic patients with CKD with ESAs to a low (9-10.9 g/dL), intermediate (11-12 g/dL), or high (>12 g/dL) haemoglobin level target compared with a strategy of managing anaemia without ESAs                                                               |
| Dany et al. <sup>5</sup>           | 2015 | France      | NR                                | NR             | NR                                      | Markov model                    | ESRD                   | Build a multi-state model with either incidence or repeated prevalence data in order to estimate the transition rates between different states of RRT                                                                                                                                     |
| de Vries et al. <sup>6</sup>       | 2016 | Netherlands | Societal                          | NR             | Cost-utility                            | State-transition model          | CKD 4                  | Cost-effectiveness of delaying ESRD in 7 European countries: the Netherlands, United Kingdom, Germany, Italy, Spain, Finland and Hungary                                                                                                                                                  |
| de Wit et al. <sup>7</sup>         | 1998 | Netherlands | Societal                          | NR             | Cost-effectiveness and cost-consequence | Markov model                    | ESRD                   | The influence of substitutive policies on the overall cost-effectiveness of the ESRD treatment program                                                                                                                                                                                    |
| Gonzalez-Perez et al. <sup>8</sup> | 2005 | UK          | NR                                | 5 and 10 years | Cost-effectiveness                      | Markov model                    | Dialysis               | Assess the costs and benefits of the three different modalities: home haemodialysis, satellite haemodialysis, hospital haemodialysis                                                                                                                                                      |
| Hiremath et al. <sup>9</sup>       | 2011 | USA         | NR                                | Lifetime       | NR                                      | Markov model and decision model | CKD 4                  | Determine the optimal vascular access referral strategy (refer all stage 4 chronic kidney disease patients for an arteriovenous fistula versus wait until the patient starts dialysis) for stage 4 (GFR <30 ml/min/1.73 m <sup>2</sup> ) CKD patients using a decision analytic framework |
| Howard et al. <sup>10</sup>        | 2009 | Australia   | Healthcare payer                  | NR             | Cost-effectiveness                      | Markov model                    | ESKD                   | Assess the costs and health outcomes of proposed changes in service provision for increasing kidney transplantation and improving the rate of home-based dialysis                                                                                                                         |
| Kiberd <sup>11</sup>               | 1997 | Canada      | Patient                           | NR             | NR                                      | Markov model                    | Renal vascular disease | Determine how effective invasive therapy for renal vascular disease to prevent renal failure should be from the perspective of the patient to warrant implementation                                                                                                                      |
| Kirby et al. <sup>12</sup>         | 2001 | UK          | NR                                | NR             | Cost-effectiveness                      | Markov model                    | Dialysis               | Determine which method of dialysis, continuous ambulatory peritoneal dialysis or haemodialysis, a patient should have as the initial method of RRT                                                                                                                                        |
| Lee et al. <sup>13</sup>           | 2006 | USA         | NR                                | NR             | Cost-effectiveness                      | Simulation model                | ESRD                   | Developed a simulation model of individuals progressing towards ESRD and requiring dialysis to analyse dialysis                                                                                                                                                                           |

|                                 |      |                            |                             |                            |                                                                                                                                        |                   |                                         |                                                                                                                                                                                                           |
|---------------------------------|------|----------------------------|-----------------------------|----------------------------|----------------------------------------------------------------------------------------------------------------------------------------|-------------------|-----------------------------------------|-----------------------------------------------------------------------------------------------------------------------------------------------------------------------------------------------------------|
|                                 |      |                            |                             |                            |                                                                                                                                        |                   |                                         | strategies and scenarios                                                                                                                                                                                  |
| Levy et al. <sup>14</sup>       | 2014 | USA                        | NR                          | 20 years                   | NR                                                                                                                                     | Markov model      | Transplant                              | Project long-term graft- and survival-related outcomes occurring among renal transplant recipients based on short-term outcomes including acute rejection and estimated GFR observed in randomised trials |
| Littlewood et al. <sup>15</sup> | 2007 | Germany                    | Healthcare payer            | 3 years                    | Cost-effectiveness                                                                                                                     | Markov model      | ESRD                                    | To understand the longer-term effects and costs of moxonidine, a decision analytic model was developed, and a cost-effectiveness analysis performed                                                       |
| Liu et al. <sup>16</sup>        | 2015 | UK                         | Payer                       | Lifetime                   | Cost-effectiveness                                                                                                                     | Markov model      | Dialysis                                | Investigate the cost-effectiveness of high-dose haemodialysis versus conventional in-center haemodialysis                                                                                                 |
| Manns et al. <sup>17</sup>      | 2007 | Canada                     | Healthcare payer            | Lifetime                   | <b>four strategies:</b><br>1. primary model<br>2. cost minimization model<br>3. mortality over time model<br>4. mortality by age model | Markov model      | ESRD                                    | Economic analysis which compared the use of sevelamer with calcium carbonate in a simulated cohort of North American dialysis patients with hyperphosphataemia                                            |
| NICE TA48 <sup>18</sup>         | 2002 | UK                         | NHS                         | Five or ten year follow up | Cost-effectiveness                                                                                                                     | Markov model      | Dialysis                                | Cost effectiveness of home haemodialysis, hospital haemodialysis and satellite haemodialysis                                                                                                              |
| Naci et al. <sup>19</sup>       | 2012 | USA                        | Third party payer           | NR                         | Cost-effectiveness                                                                                                                     | Markov model      | ESRD                                    | Determine whether Medicare's decision to cover routine administration of ESAs to treat anaemia of ESRD has been a cost-effective policy relative to standard of care at the time                          |
| Nguyen et al. <sup>20</sup>     | 2016 | Singapore                  | Third party payer           | 30 years                   | Cost-utility                                                                                                                           | Markov model      | Pre-dialysis CKD with hyperphosphatemia | Estimate the lifetime costs and QALYs gained for treatment with sevelamer versus calcium carbonate                                                                                                        |
| Nuijten et al. <sup>21</sup>    | 2015 | Italy, Netherlands and USA | Italian payer               | 9 years                    | Cost-effectiveness                                                                                                                     | Markov model      | CKD 5                                   | Determine the cost effectiveness of two innovative therapies, paricalcitol versus cinacalcet + calcitriol (oral) in patients with CKD stage 5                                                             |
| Pike et al. <sup>22</sup>       | 2017 | Norway                     | Societal                    | 5 years                    | Cost-effectiveness                                                                                                                     | Markov model      | ESRD                                    | Effectiveness and cost-effectiveness of haemodialysis performed at different locations (hospital, satellite, and home) and peritoneal dialysis                                                            |
| Rosselli et al. <sup>23</sup>   | 2015 | Colombia                   | Colombian healthcare system | 5 years                    | Cost-effectiveness                                                                                                                     | Markov Model      | ESRD                                    | Estimate the costs and effectiveness measured in QALY of kidney transplantation compared with dialysis in adults suffering from ESRD                                                                      |
| Ruggenti et al. <sup>24</sup>   | 2001 | Italy                      | Payer                       | Lifetime                   | Cost-effectiveness                                                                                                                     | NR: two models    | Chronic proteinuric nephropathies       | Predict the long-term cost and efficacy of the angiotensin-converting enzyme, ramipril, in patients with nondiabetic chronic nephropathies                                                                |
| Sennfalt et al. <sup>25</sup>   | 2002 | Sweden                     | Societal                    | 5 years                    | Cost-utility and cost-effectiveness                                                                                                    | Decision model    | CKD                                     | Compare both health-related quality of life and costs for haemodialysis and peritoneal dialysis in patients with kidney failure                                                                           |
| Shechter et al. <sup>26</sup>   | 2014 | Canada                     | Patient                     | Lifetime                   | Comparative effectiveness analysis                                                                                                     | Decision analysis | CKD                                     | Use a data-driven decision-analytic model to provide an objective approach to timing arteriovenous fistula referral in patients with CKD                                                                  |
| Takahashi et al. <sup>27</sup>  | 2008 | USA and Japan              | Japanese reimbursement      | 3 years                    | Cost-effectiveness                                                                                                                     | Markov model      | CKD                                     | Evaluate the cost-effectiveness of AST-120, an oral adsorbent that attenuates the progression of chronic kidney disease                                                                                   |

|                                                                                                                                                                                                                                                                                                                                                    |      |                     |                       |                                       |                                     |                                                                             |                                                      |                                                                                                                                                                                |
|----------------------------------------------------------------------------------------------------------------------------------------------------------------------------------------------------------------------------------------------------------------------------------------------------------------------------------------------------|------|---------------------|-----------------------|---------------------------------------|-------------------------------------|-----------------------------------------------------------------------------|------------------------------------------------------|--------------------------------------------------------------------------------------------------------------------------------------------------------------------------------|
| Teerawattananon et al. <sup>28</sup>                                                                                                                                                                                                                                                                                                               | 2007 | Thailand            | Societal              | Lifetime                              | Cost-effectiveness and cost-utility | Markov model                                                                | ESRD                                                 | Examine the value for money of including peritoneal dialysis or haemodialysis                                                                                                  |
| Thaweethamcharoen et al. <sup>29</sup>                                                                                                                                                                                                                                                                                                             | 2014 | Thailand            | Societal              | Lifetime                              | Cost-utility                        | Markov model                                                                | ESRD with anaemia, on haemodialysis                  | Compare the cost utility of using erythropoietin to maintain different haemoglobin target levels in haemodialysis patients                                                     |
| Thompson et al. <sup>30</sup>                                                                                                                                                                                                                                                                                                                      | 2013 | UK                  | NHS                   | Lifetime                              | Cost-effectiveness                  | Markov model                                                                | CKD 3-4, and not on dialysis with hyperphosphatemia  | Cost effectiveness of sevelamer vs calcium carbonate in patients with CKD and not on dialysis (CKD-ND)                                                                         |
| Vegter et al. <sup>31</sup>                                                                                                                                                                                                                                                                                                                        | 2011 | Netherlands and USA | NHS                   | Lifetime                              | Cost-effectiveness                  | A decision analytical structure was linked to a time-dependent Markov model | Second-line treatment in patients receiving dialysis | Cost-effectiveness of the noncalcium-based phosphate binder lanthanum carbonate as second-line treatment of hyperphosphatemia after therapy failure with calcium-based binders |
| Villa et al. <sup>32</sup>                                                                                                                                                                                                                                                                                                                         | 2012 | Spain               | Public administration | Lifetime temporal horizon of 45 years | Cost-effectiveness                  | Markov model                                                                | Renal disease                                        | Cost-effectiveness analysis of timely dialysis referral after renal transplant failure                                                                                         |
| Yang et al. <sup>33</sup>                                                                                                                                                                                                                                                                                                                          | 2016 | Singapore           | Societal              | 10 years                              | Cost-utility                        | Markov Model                                                                | ESRD                                                 | Cost-effectiveness of haemodialysis, continuous ambulatory peritoneal dialysis and automated peritoneal dialysis for patients with ESRD                                        |
| <p><i>ACEI: angiotensin converting enzyme inhibitor; CKD: chronic kidney disease; ESA: erythropoiesis-stimulating agents; ESRD: end-stage renal disease; ESKD: end-stage kidney disease; GFR: glomerular filtration rate; NHS: National Health System; NR: not reported; QALY: quality-adjusted life year; RRT: renal replacement therapy.</i></p> |      |                     |                       |                                       |                                     |                                                                             |                                                      |                                                                                                                                                                                |

**Supplementary Table 12. Summary of unique models: health states, disease progression, CV events and discount rates**

| Study                              | Health states related to kidney disease                                                                                                                                                                                                                            | Approach used to model CKD progression                                             | Approach used to model CV events               | Discounting                   |
|------------------------------------|--------------------------------------------------------------------------------------------------------------------------------------------------------------------------------------------------------------------------------------------------------------------|------------------------------------------------------------------------------------|------------------------------------------------|-------------------------------|
| Adarkwah et al. <sup>1</sup>       | Advanced renal disease, ESRD, death                                                                                                                                                                                                                                | Transition probabilities                                                           | NR                                             | 3%                            |
| Adarkwah et al. <sup>2</sup>       | Advanced renal disease, ESRD, death                                                                                                                                                                                                                                | Transition probabilities                                                           | NR                                             | Costs: 4%<br>Benefits: 1.5%   |
| Beby et al. <sup>3</sup>           | Conventional ICHD, conventional HD at home, high dose ICHD, high dose HD at home, PD, kidney transplantation                                                                                                                                                       | Transition probabilities                                                           | NR                                             | Costs: 4%<br>Benefits: 1.5%   |
| Clement et al. <sup>4</sup>        | Alive, not on dialysis (NDD), dialysis, transplanted, continue dialysis                                                                                                                                                                                            | Age-specific risk of initiating dialysis therapy                                   | NR                                             | 5%                            |
| Dany et al. <sup>5</sup>           | HD, PD, transplantation, death                                                                                                                                                                                                                                     | Transition rates                                                                   | NR                                             | NR                            |
| de Vries et al. <sup>6</sup>       | CKD4 conventional treatment, CKD prolongation due to new intervention under investigation, ESRD dialysis, ESRD transplantation, death                                                                                                                              | Annual incidence of CKD, transplantation and transplantation probability (Table 1) | NR                                             | 3%                            |
| de Wit et al. <sup>7</sup>         | 36 different states (combination of six treatment modalities: CHD, LCHD, HHD, CAPD, CCPD, transplant, three age groups and two treatment stages                                                                                                                    | Transition probabilities                                                           | NR                                             | 5%                            |
| Gonzalez-Perez et al. <sup>8</sup> | Home HD, Satellite HD, hospital HD, CAPD, transplant, death                                                                                                                                                                                                        | Transition probabilities                                                           | NR                                             | 1.5%                          |
| Hiremath et al. <sup>9</sup>       | CKD 4, CKD 4 with AVF, Dialysis with CVC, dialysis with AVF, death                                                                                                                                                                                                 | Transition probabilities                                                           | Probability of HF, derived from expert opinion | NR                            |
| Howard et al. <sup>10</sup>        | New ESKD patients requiring RRT, pre-emptive transplant, dialysis (hospital HD, home HD, satellite HD, PD), transplant, dead graft failure, continued graft function, continued dialysis, regrant, continued graft function, death ESKD causes, death other causes | Transition probabilities                                                           | NR                                             | 5%                            |
| Kiberd <sup>11</sup>               | No screen, screen, non-operable, dialysis, survive, death                                                                                                                                                                                                          | Annual progression                                                                 | NR                                             | NR                            |
| Kirby et al. <sup>12</sup>         | HD, CAPD, complication, death                                                                                                                                                                                                                                      | Transition probabilities                                                           | NR                                             | 6%                            |
| Lee et al. <sup>13</sup>           | eGFR deterioration, transplant arrival, graft failure, hospitalisation, death                                                                                                                                                                                      | eGFR deterioration rate                                                            | NR                                             | 3%                            |
| Levy et al. <sup>14</sup>          | Phase 1: Functioning graft: 2, 3a, 3b, 4 NODM, AR, graft loss, death<br>Phase 2 (Markov model): functioning graft, failed graft (return to dialysis) functioning regrant, death                                                                                    | Annual probabilities of experiencing graft failure or death (Weibull models)       | NR                                             | NR                            |
| Littlewood et al. <sup>15</sup>    | Non-ESRD state (NESRD), ESRD, death                                                                                                                                                                                                                                | Mean decline in GFR and transition probability                                     | NR                                             | Costs: 4%<br>Life-years: 1.5% |
| Liu et al. <sup>16</sup>           | Conventional ICHD, high dose HD (in-centre or home), transplant, PD                                                                                                                                                                                                | Transition probabilities                                                           | NR                                             | 3.5%                          |
| Manns et al. <sup>17</sup>         | Dialysis, transplanted, continue dialysis, death                                                                                                                                                                                                                   | Transition probabilities                                                           | NR                                             | 5%                            |
| NICE TA48 <sup>18</sup>            | Hospital HD, satellite HD, home HD, CAPD, transplantation, death                                                                                                                                                                                                   | Transition probabilities                                                           | NR                                             | Costs: 6%<br>QoL values: 1.5% |
| Naci et al. <sup>19</sup>          | Dialysis without transplant, dialysis after failed transplant, transplant, dead                                                                                                                                                                                    | Transition probabilities                                                           | NR                                             | NR                            |

|                                                                                                                                                                                                                                                                                                                                                                                                                                                                                                                                                                                                                                                                                                                                                                                                                        |                                                                                                       |                                                                                                                     |                                                                        |      |
|------------------------------------------------------------------------------------------------------------------------------------------------------------------------------------------------------------------------------------------------------------------------------------------------------------------------------------------------------------------------------------------------------------------------------------------------------------------------------------------------------------------------------------------------------------------------------------------------------------------------------------------------------------------------------------------------------------------------------------------------------------------------------------------------------------------------|-------------------------------------------------------------------------------------------------------|---------------------------------------------------------------------------------------------------------------------|------------------------------------------------------------------------|------|
| Nguyen et al. <sup>20</sup>                                                                                                                                                                                                                                                                                                                                                                                                                                                                                                                                                                                                                                                                                                                                                                                            | CKD with no dialysis, ESRD, all-cause mortality                                                       | Transition probabilities                                                                                            | NR                                                                     | 3.5% |
| Nuijten et al. <sup>21</sup>                                                                                                                                                                                                                                                                                                                                                                                                                                                                                                                                                                                                                                                                                                                                                                                           | Predialysis, PD, HD, transplant, death                                                                | Transition probabilities                                                                                            | Relative risk of CV event, derived from Cunningham (2005)              | 3%   |
| Pike et al. <sup>22</sup>                                                                                                                                                                                                                                                                                                                                                                                                                                                                                                                                                                                                                                                                                                                                                                                              | HD (hospital, self-care, satellite, home), PD (CAPD, APD), transplantation, death                     | Probability                                                                                                         | Occurrence rate of MI and angina derived from Norwegian Renal Registry | 4%   |
| Rosselli et al. <sup>23</sup>                                                                                                                                                                                                                                                                                                                                                                                                                                                                                                                                                                                                                                                                                                                                                                                          | Second line, healthy graft, dialysis, chronic rejection, acute rejection, PD, HD, death               | Transition probabilities                                                                                            | NR                                                                     | 3%   |
| Ruggenti et al. <sup>24</sup>                                                                                                                                                                                                                                                                                                                                                                                                                                                                                                                                                                                                                                                                                                                                                                                          | Proteinuric chronic nephropathy, treatment (ramipril or placebo), conservative therapy, RRT, death    | GFR rate of decline event-based-incidence of ESRD                                                                   | NR                                                                     | 5%   |
| Sennfalt et al. <sup>25</sup>                                                                                                                                                                                                                                                                                                                                                                                                                                                                                                                                                                                                                                                                                                                                                                                          | PD, HD, transplant, infection, death                                                                  | Probability                                                                                                         | NR                                                                     | 3%   |
| Shechter et al. <sup>26</sup>                                                                                                                                                                                                                                                                                                                                                                                                                                                                                                                                                                                                                                                                                                                                                                                          | Figure 1: overview of Monte Carlo simulation model                                                    | Mean rate of eGFR decline                                                                                           | NR                                                                     | NR   |
| Takahashi et al. <sup>27</sup>                                                                                                                                                                                                                                                                                                                                                                                                                                                                                                                                                                                                                                                                                                                                                                                         | CKD, serum creatinine 5, serum creatinine 6, serum creatinine 7, serum creatine 8, dialysis, death    | Transition probabilities (calculated slope of the reciprocal of serum creatinine = the rate of disease progression) | NR                                                                     | 3%   |
| Teerawattananon et al. <sup>28</sup>                                                                                                                                                                                                                                                                                                                                                                                                                                                                                                                                                                                                                                                                                                                                                                                   | ESRD, initial mode of dialysis, switching to another mode of dialysis, death                          | Transition probabilities                                                                                            | NR                                                                     | 3.5% |
| Thaweethamcharoen et al. <sup>29</sup>                                                                                                                                                                                                                                                                                                                                                                                                                                                                                                                                                                                                                                                                                                                                                                                 | Alive with HD, alive with HD and cardiovascular disease                                               | Transition probabilities                                                                                            | NR                                                                     | 3%   |
| Thompson et al. <sup>30</sup>                                                                                                                                                                                                                                                                                                                                                                                                                                                                                                                                                                                                                                                                                                                                                                                          | Alive without dialysis, alive with dialysis, dead                                                     | Treatment-specific monthly probabilities for the initiation of dialysis                                             | NR                                                                     | 3.5% |
| Vegter et al. <sup>31</sup>                                                                                                                                                                                                                                                                                                                                                                                                                                                                                                                                                                                                                                                                                                                                                                                            | Pre-dialysis patients, patients receiving dialysis, death                                             | CKD progression rate                                                                                                | NR                                                                     | 3.5% |
| Villa et al. <sup>32</sup>                                                                                                                                                                                                                                                                                                                                                                                                                                                                                                                                                                                                                                                                                                                                                                                             | HD, PD, kidney transplantation, late referral haemodialysis, late referral peritoneal dialysis, death | Transition probabilities                                                                                            | NR                                                                     | 3%   |
| Yang et al. <sup>33</sup>                                                                                                                                                                                                                                                                                                                                                                                                                                                                                                                                                                                                                                                                                                                                                                                              | Dialysis, kidney transplantation, death                                                               | Transition probabilities                                                                                            | NR                                                                     | 3%   |
| <p><i>AVF: arteriovenous fistula; CAPD: Continuous ambulatory peritoneal dialysis; CCPD: continuous cycling peritoneal dialysis; CVC: central venous catheter; CVD: cardiovascular disease; eGFR: estimated glomerular filtration rate; ESKD: end-stage kidney disease; ESRD: end-stage renal disease; ECD: expanded criteria donor; HD: haemodialysis; HF: heart failure; HHD: home haemodialysis; ICHD: in-center haemodialysis; KT: kidney transplant; LCHD: limited care haemodialysis; LDKT: living donor kidney transplant; MI: myocardial infarction; NESRD: non ESRD; NODM: new-onset diabetes mellitus; NDD: non dialysis dependent; NA: not applicable; NR: not reported; PD: peritoneal dialysis; SCD: standard criteria donor.</i></p> <p><i>*Studies included additional non-renal health states.</i></p> |                                                                                                       |                                                                                                                     |                                                                        |      |

**Supplementary Table 13. Summary of unique models: Sensitivity analyses and drivers of cost-effectiveness**

| Study                              | Sensitivity analyses                   | Drivers of cost-effectiveness                                                                                                                                                           | Validation                                                                                                                                                                                                                                                                                                                                                                                                                |
|------------------------------------|----------------------------------------|-----------------------------------------------------------------------------------------------------------------------------------------------------------------------------------------|---------------------------------------------------------------------------------------------------------------------------------------------------------------------------------------------------------------------------------------------------------------------------------------------------------------------------------------------------------------------------------------------------------------------------|
| Adarkwah et al. <sup>1</sup>       | One-way                                | Effectiveness of ACEI treatment, the discount rate of costs and effects, and the cost of ESRD                                                                                           | NR                                                                                                                                                                                                                                                                                                                                                                                                                        |
| Adarkwah et al. <sup>2</sup>       | One-way and multivariate (Monte Carlo) | Effectiveness of ACEI treatment, the costs of ESRD, and the discount rates of costs and effects                                                                                         | NR                                                                                                                                                                                                                                                                                                                                                                                                                        |
| Beby et al. <sup>3</sup>           | One-way and probabilistic              | Utilities associated with conventional home HD benefit and the reimbursement tariff for conventional HD and high dose HD at home, hospital reimbursement levels and the frequency of HD | Secondary validation of the model and its input parameters with healthcare payers as well as key opinion leaders                                                                                                                                                                                                                                                                                                          |
| Clement et al. <sup>4</sup>        | Monte Carlo and scenario               | NR                                                                                                                                                                                      | NR                                                                                                                                                                                                                                                                                                                                                                                                                        |
| Dany et al. <sup>5</sup>           | NR                                     | NR                                                                                                                                                                                      | NR                                                                                                                                                                                                                                                                                                                                                                                                                        |
| de Vries et al. <sup>6</sup>       | NR                                     | NR                                                                                                                                                                                      | NR                                                                                                                                                                                                                                                                                                                                                                                                                        |
| de Wit et al. <sup>7</sup>         | One-way and scenario                   | NR                                                                                                                                                                                      | NR                                                                                                                                                                                                                                                                                                                                                                                                                        |
| Gonzalez-Perez et al. <sup>8</sup> | Conducted, details NR                  | Cost-effectiveness of both home and satellite HD are considerably affected by changes in staff costs                                                                                    | NR                                                                                                                                                                                                                                                                                                                                                                                                                        |
| Hiremath et al. <sup>9</sup>       | Probabilistic and two-way              | NR                                                                                                                                                                                      | Model verification (debugging) was done by building up the model from simple to more complex, checking each step visually, examining the state probabilities from the cohort analysis, exploring certain extreme values and doing a sensitivity analysis on all variables. The model was calibrated by comparing simulated events (mortality for dialysis patients in the model) to observed ones (from the USRDS report) |
| Howard et al. <sup>10</sup>        | Conducted, details NR                  | No drivers                                                                                                                                                                              | NR                                                                                                                                                                                                                                                                                                                                                                                                                        |
| Kiberd <sup>11</sup>               | NR                                     | NR                                                                                                                                                                                      | NR                                                                                                                                                                                                                                                                                                                                                                                                                        |
| Kirby et al. <sup>12</sup>         | Scenario                               | NR                                                                                                                                                                                      | NR                                                                                                                                                                                                                                                                                                                                                                                                                        |

|                                 |                                                    |                                                                                                                                                                                                                                                                                                                          |                                                                                                                                                                                                                                                                                                                                                                                                                                                                                                                                                                                                                                                                                                                                                                                |
|---------------------------------|----------------------------------------------------|--------------------------------------------------------------------------------------------------------------------------------------------------------------------------------------------------------------------------------------------------------------------------------------------------------------------------|--------------------------------------------------------------------------------------------------------------------------------------------------------------------------------------------------------------------------------------------------------------------------------------------------------------------------------------------------------------------------------------------------------------------------------------------------------------------------------------------------------------------------------------------------------------------------------------------------------------------------------------------------------------------------------------------------------------------------------------------------------------------------------|
| Lee et al. <sup>13</sup>        | One-way                                            | Cost and event rate estimates                                                                                                                                                                                                                                                                                            | <p>1. Compared simulated outcomes to historical data published by the USRDS. This part of the analysis ensured that the various outcomes generated by the model were realistic in absolute terms.</p> <p>2. Performed sensitivity analysis based on the 3 hypothetical policies: Early Initiation, Late Initiation, and No Dialysis. We examined how the relative rankings of their cost-effectiveness ratios (calculated based on simulated sample of 1 million patients) were affected by perturbations in hazard rates (<math>\pm 20\%</math>), costs (<math>\pm 20\%</math>), quality-of-life scores (<math>\pm 20\%</math>), discount rate (<math>\pm 50\%</math>), and dose response model parameters for both hospitalization and mortality (<math>\pm 20\%</math>)</p> |
| Levy et al. <sup>14</sup>       | Probabilistic                                      | NR                                                                                                                                                                                                                                                                                                                       | Model verification included testing for internal consistency using extensive debugging and testing extreme conditions and calibration against the source data (i.e. USRDS)                                                                                                                                                                                                                                                                                                                                                                                                                                                                                                                                                                                                     |
| Littlewood et al. <sup>15</sup> | Probabilistic and scenario                         | NR                                                                                                                                                                                                                                                                                                                       | NR                                                                                                                                                                                                                                                                                                                                                                                                                                                                                                                                                                                                                                                                                                                                                                             |
| Liu et al. <sup>16</sup>        | One-way, probabilistic and scenario                | A higher number of HD sessions per week or a higher tariff for those sessions is associated with a lower net benefit. HD survival parameters were also important drivers of model results                                                                                                                                | Model was validated at a clinical advisory board and with a UK-based nephrology key opinion leader who had been involved in both inpatient and outpatient NHS renal services and in NICE appraisals of HD and PD. Although the 2013-2014 PbR dialysis tariff was used for the analysis, the tariff represents the national average costs of providing dialysis care in England. In addition, consistent conclusions were drawn using PbR dialysis tariffs since 2011-2012, when a tariff for home HD was introduced                                                                                                                                                                                                                                                            |
| Manns et al. <sup>17</sup>      | One-way and scenario                               | Impact of quality of life (but using baseline mortality rates from our Canadian cohort), the use of sevelamer, compared with calcium-based phosphate binders, resulted in a cost per life year gain of CAN \$102,600                                                                                                     | Tested for logical inconsistencies in our decision model by evaluating them under hypothetical conditions. Determined that the models had face validity and confirmed that the mathematical calculations were accurate and consistent with the specifications of the model. We also confirmed that our model had predictive validity by comparing model outputs (a function of both input variables and model structure) with observed data from the DCOR study (data not shown). This comprehensive validation increases confidence in each of these models                                                                                                                                                                                                                   |
| NICE TA48 <sup>18</sup>         | Conducted, details NR                              | Principle variables involved were the cost of dialysis machines and the length of the training period for home haemodialysis                                                                                                                                                                                             | NR                                                                                                                                                                                                                                                                                                                                                                                                                                                                                                                                                                                                                                                                                                                                                                             |
| Naci et al. <sup>19</sup>       | Probabilistic and scenario                         | All-cause mortality estimate: when relative risk of all-cause mortality was assumed to be higher for the transfusion cohort, the ESA cohort accrued higher QALYs and lower costs than the transfusion cohort between 1995 and 2004. Similarly, the model was sensitive to the hospitalization estimate used in the model | Validity of this approach was evaluated by comparing the predicted number of clinical outcomes obtained from the model to the total numbers experienced by the US ESRD patient population. Validity of this approach was evaluated by comparing the predicted cost estimate obtained from the model to the total Medicare inpatient and outpatient expenditures for USRDS patient population                                                                                                                                                                                                                                                                                                                                                                                   |
| Nguyen et al. <sup>20</sup>     | Deterministic and probabilistic                    | Prices of sevelamer and dialysis                                                                                                                                                                                                                                                                                         | NR                                                                                                                                                                                                                                                                                                                                                                                                                                                                                                                                                                                                                                                                                                                                                                             |
| Nuijten et al. <sup>21</sup>    | One-way and scenario                               | Annual probability of clinical events for paricalcitol, which corresponds with hospitalization                                                                                                                                                                                                                           | NR                                                                                                                                                                                                                                                                                                                                                                                                                                                                                                                                                                                                                                                                                                                                                                             |
| Pike et al. <sup>22</sup>       | Probabilistic and scenario                         | NR                                                                                                                                                                                                                                                                                                                       | NR                                                                                                                                                                                                                                                                                                                                                                                                                                                                                                                                                                                                                                                                                                                                                                             |
| Rosselli et al. <sup>23</sup>   | One-way, multivariate and a Monte Carlo simulation | Monthly cost of immunosuppression and monthly cost of dialysis                                                                                                                                                                                                                                                           | NR                                                                                                                                                                                                                                                                                                                                                                                                                                                                                                                                                                                                                                                                                                                                                                             |
| Ruggenti et al. <sup>24</sup>   | Conducted, details NR                              | NR                                                                                                                                                                                                                                                                                                                       | NR                                                                                                                                                                                                                                                                                                                                                                                                                                                                                                                                                                                                                                                                                                                                                                             |



|                                                                                                                                                                                                                                                                                                                                                         |                                                         |                                                                                                                                                       |                                                                                                                                                                                                                                                                |
|---------------------------------------------------------------------------------------------------------------------------------------------------------------------------------------------------------------------------------------------------------------------------------------------------------------------------------------------------------|---------------------------------------------------------|-------------------------------------------------------------------------------------------------------------------------------------------------------|----------------------------------------------------------------------------------------------------------------------------------------------------------------------------------------------------------------------------------------------------------------|
| Sennfalt et al. <sup>25</sup>                                                                                                                                                                                                                                                                                                                           | Conducted, details NR                                   | NR                                                                                                                                                    | NR                                                                                                                                                                                                                                                             |
| Shechter et al. <sup>26</sup>                                                                                                                                                                                                                                                                                                                           | One-way, two-way and probabilistic                      | NR                                                                                                                                                    | Compared survival curves of simulated patients who enter the clinic in CKD 3 and 4 with the Kaplan-Meier survival curves of our kidney clinic cohort who entered in the same stages                                                                            |
| Takahashi et al. <sup>27</sup>                                                                                                                                                                                                                                                                                                                          | One-way                                                 | NR                                                                                                                                                    | NR                                                                                                                                                                                                                                                             |
| Teerawattananon et al. <sup>28</sup>                                                                                                                                                                                                                                                                                                                    | Probabilistic                                           | NR                                                                                                                                                    | NR                                                                                                                                                                                                                                                             |
| Thaweethamcharoen et al. <sup>29</sup>                                                                                                                                                                                                                                                                                                                  | Probabilistic performed by using Monte-Carlo simulation | NR                                                                                                                                                    | NR                                                                                                                                                                                                                                                             |
| Thompson et al. <sup>30</sup>                                                                                                                                                                                                                                                                                                                           | One-way and probabilistic                               | Time horizon, mean daily dose of sevelamer, alternative assumptions regarding the impact of sevelamer on initiation of dialysis, and cost of dialysis | NR                                                                                                                                                                                                                                                             |
| Vegter et al. <sup>31</sup>                                                                                                                                                                                                                                                                                                                             | Probabilistic and scenario                              | Rate of CKD progression in predialysis patients, unrelated future dialysis costs                                                                      | External validity of our model is supported by observational data of 335 Canadian CKD predialysis patients (median survival of 6.4 years) (Devins, 2005) and more than 3000 Scottish incident dialysis patients (median survival of 3.2 years) (Sawhney, 2009) |
| Villa et al. <sup>32</sup>                                                                                                                                                                                                                                                                                                                              | One-way and probabilistic (Monte Carlo simulation)      | HD and late referral HD prevalence costs, and HD utilities                                                                                            | NR                                                                                                                                                                                                                                                             |
| Yang et al. <sup>33</sup>                                                                                                                                                                                                                                                                                                                               | One-way, probabilistic and high-risk group analysis     | Utility of HD                                                                                                                                         | NR                                                                                                                                                                                                                                                             |
| <p><i>ACEI: angiotensin-converting-enzyme inhibitor; ESA: erythropoiesis-stimulating agent; ESRD: end-stage renal disease; HD: haemodialysis; NA: not applicable; NICE: National Institute for Health and Care Excellence; NR: not reported; PD: peritoneal dialysis; QALY: quality-adjusted life year; USRDS: United States renal data system.</i></p> |                                                         |                                                                                                                                                       |                                                                                                                                                                                                                                                                |

## References

1. Adarkwah CC, Gandjour A, Akkerman M, et al. Cost-effectiveness of Angiotensin-converting enzyme inhibitors for the prevention of diabetic nephropathy in The Netherlands - A Markov model. *PLoS ONE*. 2011;6(10).
2. Adarkwah CC, Gandjour A, Akkerman M, et al. To treat or not to treat? Cost-effectiveness of ace inhibitors in non-diabetic advanced renal disease - a Dutch perspective. *Kidney Blood Press Res*. 2013;37(2-3):168-80.
3. Beby AT, Cornelis T, Zinck R, et al. Cost-Effectiveness of High Dose Hemodialysis in Comparison to Conventional In-Center Hemodialysis in the Netherlands. *Adv Ther*. 2016;33(11):2032-48.
4. Clement FM, Klarenbach S, Tonelli M, et al. An economic evaluation of erythropoiesis-stimulating agents in CKD. *Am J Kidney Dis*. 2010;56(6):1050-61.
5. Dany A, Dantony E, Elsensohn M-H, et al. Using Repeated-Prevalence Data in Multi-state Modeling of Renal Replacement Therapy. *Journal of Applied Statistics*. 2015;42(5-6):1278-90.
6. de Vries EF, Rabelink TJ, van den Hout WB. Modelling the Cost-Effectiveness of Delaying End-Stage Renal Disease. *Nephron*. 2016;133(2):89-97.
7. de Wit GA, Ramsteijn PG, de Charro FT. Economic evaluation of end stage renal disease treatment. *Health Policy*. 1998;44(3):215-32.
8. Gonzalez-Perez JG, Vale L, Stearns SC, et al. Hemodialysis for end-stage renal disease: A cost-effectiveness analysis of treatment options. *International journal of technology assessment in health care*. 2005;21(1):32-9.
9. Hiremath S, Knoll G, Weinstein MC. Should the arteriovenous fistula be created before starting dialysis?: A decision analytic approach. *PLoS One*. 2011;6(12).
10. Howard K, Salkeld G, White S, et al. The cost-effectiveness of increasing kidney transplantation and home-based dialysis. *Nephrology (Carlton)*. 2009;14(1):123-32.
11. Kiberd BA. A patient centered approach to the treatment of renal vascular disease to prevent end stage renal failure. *Geriatr Nephrol Urol*. 1997;7(2):61-6.
12. Kirby L, Vale L. Dialysis for end-stage renal disease. Determining a cost-effective approach. *Int J Technol Assess Health Care*. 2001;17(2):181-9.
13. Lee CP, Chertow G, Zenios SA. A simulation model to estimate the cost and effectiveness of alternative dialysis initiation strategies (Structured abstract). *Medical Decision Making [Internet]*. 2006; 26(2):[535-49 pp.]. Available from: <http://onlinelibrary.wiley.com/doi/10.1111/j.1365-3113.2006.04535.x>

[22006008380/frame.html](https://doi.org/10.1186/s12916-018-1220-6).

14. Levy AR, Briggs AH, Johnston K, et al. Projecting long-term graft and patient survival after transplantation. *Value Health*. 2014;17(2):254-60.
15. Littlewood KJ, Greiner W, Baum D, et al. Adjunctive treatment with moxonidine versus nitrendipine for hypertensive patients with advanced renal failure: a cost-effectiveness analysis. *BMC Nephrol*. 2007;8:9.
16. Liu FX, Treharne C, Arici M, et al. High-dose hemodialysis versus conventional in-center hemodialysis: a cost-utility analysis from a UK payer perspective. *Value Health*. 2015;18(1):17-24.
17. Manns B, Klarenbach S, Lee H, et al. Economic evaluation of sevelamer in patients with end-stage renal disease. *Nephrol Dial Transplant*. 2007;22(10):2867-78.
18. National Institute for Health and Care Excellence. Technology appraisal guidance [TA48]: Guidance on home compared with hospital haemodialysis for patients with end-stage renal failure 20 December 2017. Available from: <https://www.nice.org.uk/guidance/ta48>.
19. Naci H, de Lissovoy G, Hollenbeak C, et al. Historical clinical and economic consequences of anemia management in patients with end-stage renal disease on dialysis using erythropoietin stimulating agents versus routine blood transfusions: a retrospective cost-effectiveness analysis. *J Med Econ*. 2012;15(2):293-304.
20. Nguyen HV, Bose S, Finkelstein E. Incremental cost-utility of sevelamer relative to calcium carbonate for treatment of hyperphosphatemia among pre-dialysis chronic kidney disease patients. *BMC Nephrol*. 2016;17(1):45.
21. Nuijten M, Roggeri DP, Roggeri A, et al. Health economic evaluation of paricalcitol((R)) versus cinacalcet + calcitriol (oral) in Italy. [corrected]. *Clin Drug Investig*. 2015;35(4):229-38.
22. Pike E, Hamidi V, Ringerike T, et al. More Use of Peritoneal Dialysis Gives Significant Savings: A Systematic Review and Health Economic Decision Model. *J Clin Med Res*. 2017;9(2):104-16.
23. Rosselli D, Rueda JD, Diaz CE. Cost-effectiveness of kidney transplantation compared with chronic dialysis in end-stage renal disease. *Saudi J Kidney Dis Transpl*. 2015;26(4):733-8.
24. Ruggenenti P, Pagano E, Tammuzzo L, et al. Ramipril prolongs life and is cost effective in chronic proteinuric nephropathies (Structured abstract). *Kidney Int* [Internet]. 2001; 59(1):[286-94 pp.]. Available from: <http://onlinelibrary.wiley.com/doi/10.1054/kid.2001.22001000236/frame.html>.
25. Sennfalt K, Magnusson M, Carlsson P. Comparison of hemodialysis and peritoneal dialysis--a cost-

- utility analysis. *Perit Dial Int.* 2002;22(1):39-47.
26. Shechter SM, Chandler T, Skandari MR, et al. Cost-effectiveness Analysis of Vascular Access Referral Policies in CKD. *Am J Kidney Dis.* 2017;70(3):368-76.
  27. Takahashi T, Reed SD, Schulman KA. Cost-effectiveness of the oral adsorbent AST-120 versus placebo for chronic kidney disease. *Nephrology (Carlton).* 2008;13(5):419-27.
  28. Teerawattananon Y, Mugford M, Tangcharoensathien V. Economic evaluation of palliative management versus peritoneal dialysis and hemodialysis for end-stage renal disease: evidence for coverage decisions in Thailand. *Value Health.* 2007;10(1):61-72.
  29. Thaweethamcharoen T, Sakulbumrungsil R, Nopmaneejumruslers C, et al. Cost-Utility Analysis of Erythropoietin for Anemia Treatment in Thai End-Stage Renal Disease Patients with Hemodialysis. *Value in Health Regional Issues.* 2014;3(1):44-9.
  30. Thompson M, Bartko-Winters S, Bernard L, et al. Economic evaluation of sevelamer for the treatment of hyperphosphatemia in chronic kidney disease patients not on dialysis in the United Kingdom. *J Med Econ.* 2013;16(6):744-55.
  31. Vegter S, Tolley K, Keith MS, et al. Cost-effectiveness of lanthanum carbonate in the treatment of hyperphosphatemia in chronic kidney disease before and during dialysis. *Value Health.* 2011;14(6):852-8.
  32. Villa G, Sanchez-Alvarez E, Cuervo J, et al. Cost-effectiveness analysis of timely dialysis referral after renal transplant failure in Spain. *BMC Health Serv Res.* 2012;12:257.
  33. Yang F, Lau T, Luo N. Cost-effectiveness of haemodialysis and peritoneal dialysis for patients with end-stage renal disease in Singapore. *Nephrology (Carlton).* 2016;21(8):669-77.
