# Supplementary material for: Economic Modelling of Chronic Kidney Disease: A Systematic Literature Review to Inform Conceptual Model Design
Source: Springer Nature journal article supplement (doi:10.1007/s40273-019-00835-z), 2019-09-30
Supplement: MOESM1 [file 24130926]

**ECONOMIC MODELLING OF CHRONIC KIDNEY DISEASE: A SYSTEMATIC LITERATURE  
REVIEW TO INFORM CONCEPTUAL MODEL DESIGN**

Daniel M Sugrue<sup>1</sup>, Thomas Ward<sup>1</sup>, Sukhvir Rai<sup>1</sup>, Phil McEwan<sup>1</sup>, Heleen GM van Haalen<sup>2</sup>

<sup>1</sup>Health Economics and Outcomes Research Limited, Cardiff, UK

<sup>2</sup>Global Health Economics, AstraZeneca, Gothenburg, Sweden

**Corresponding author**

Daniel M Sugrue

Health Economics and Outcomes Research Ltd

Rhymney House, Unit A Copse Walk, Cardiff Gate Business Park, Cardiff CF23 8RB

Email: [daniel.sugrue@heor.co.uk](mailto:daniel.sugrue@heor.co.uk)

Tel: +44 (0) 2920 399 146

## Online Resource 1

**Supplementary Table 1. Medline (PubMed) search terms for studies of health economic models for the simulation of patients with CKD**

| #  | Search terms                                                                                                                                                               | Number of hits |
|----|----------------------------------------------------------------------------------------------------------------------------------------------------------------------------|----------------|
| 1  | "Kidney Failure, Chronic"[MeSH Terms]                                                                                                                                      | 85,711         |
| 2  | "Renal Insufficiency, Chronic"[MeSH Terms]                                                                                                                                 | 98,686         |
| 3  | "Renal Insufficiency"[MeSH Terms]                                                                                                                                          | 148,597        |
| 4  | "Kidney Diseases"[MeSH Terms]                                                                                                                                              | 463,879        |
| 5  | nephrop*[Text Word] OR kidney[Text Word] OR renal[Text Word]                                                                                                               | 983,057        |
| 6  | (endstage[Text Word] OR end-stage[Text Word]) AND (renal[Text Word] OR kidney*[Text Word])                                                                                 | 38,447         |
| 7  | proteinuri*[Text Word] OR albuminuria*[Text Word] OR uremia*[Text Word] OR uraemia*[Text Word]                                                                             | 80,885         |
| 8  | (kidney[Title/Abstract] OR renal[Title/Abstract]) AND (disease*[Title/Abstract] OR failure*[Title/Abstract] OR sufficien*[Title/Abstract] OR insufficien*[Title/Abstract]) | 304,861        |
| 9  | esrd[Title/Abstract] OR eskd[Title/Abstract] OR esrf[Title/Abstract] OR ckd[Title/Abstract] OR ckd[Title/Abstract] OR crf[Title/Abstract] OR crd[Title/Abstract]           | 49,432         |
| 10 | #1 OR #2 OR #3 OR #4 OR #5 OR #6 OR #7 OR #8 OR #9                                                                                                                         | 1,066,111      |
| 11 | "economics, medical"[MeSH Terms]                                                                                                                                           | 13,976         |
| 12 | "economic evaluation" OR "economic evaluations"                                                                                                                            | 9,753          |
| 13 | "fee" or "fees"                                                                                                                                                            | 38892          |
| 14 | "health care costs"[MeSH Terms]                                                                                                                                            | 55976          |
| 15 | "drug costs"[MeSH Terms]                                                                                                                                                   | 14135          |
| 16 | "cost-benefit analysis"[MeSH Terms] OR "cost effectiveness"[Text Word] OR "cost-effectiveness"[Title/Abstract] OR CEA[Title/Abstract]                                      | 112737         |
| 17 | cost[Title/Abstract] OR costs[Title/Abstract] OR costing[Title/Abstract]                                                                                                   | 437362         |
| 18 | "cost effective*"[Title/Abstract] OR "cost utilit*"[Title/Abstract] OR "cost benefit*"[Title/Abstract] OR "cost minimi*"[Title/Abstract]                                   | 81,117         |
| 19 | economic*[Title/Abstract] OR pharmacoeconomic*[Title/Abstract]                                                                                                             | 230,698        |
| 20 | expenditure*[Title/Abstract] NOT energy[Title/Abstract]                                                                                                                    | 24,366         |
| 21 | value[Title/Abstract] AND money[Title/Abstract]                                                                                                                            | 2,461          |
| 22 | Budget*[Title/Abstract]                                                                                                                                                    | 24,724         |
| 23 | #11 OR #12 OR #13 OR #14 OR #15 OR #16 OR #17 OR #18 OR #19 OR #20 OR #21 OR #22                                                                                           | 724,013        |
| 24 | "energy cost"[Title/Abstract] OR "oxygen cost"[Title/Abstract]                                                                                                             | 3,560          |
| 25 | "metabolic cost"[Title/Abstract]                                                                                                                                           | 1,173          |
| 26 | "energy expenditure"[Title/Abstract] OR "oxygen expenditure"[Title/Abstract]                                                                                               | 21,496         |
| 27 | #24 OR #25 OR #26                                                                                                                                                          | 25,326         |
| 28 | #23 NOT #27                                                                                                                                                                | 718,241        |
| 29 | #10 AND #28                                                                                                                                                                | 17,889         |
| 30 | "quality adjusted life year*" OR "quality-adjusted life year" OR QALY                                                                                                      | 14,540         |
| 31 | "incremental cost effectiveness ratio*" OR ICER                                                                                                                            | 4,987          |
| 32 | "life year" OR "life-year"                                                                                                                                                 | 5,991          |
| 33 | #30 OR #31 OR #32                                                                                                                                                          | 17,714         |
| 34 | #29 AND #33                                                                                                                                                                | 569            |
| 35 | case report OR case study OR letter OR editorial OR case reports[Publication Type] OR letter[Publication Type] OR editorial[Publication Type]                              | 3,244,456      |
| 36 | #34 NOT #35                                                                                                                                                                | 556            |
| 37 | #36 AND English [Language]                                                                                                                                                 | 539            |

**Supplementary Table 2. EMBASE search terms for studies of health economic models for the simulation of patients with CKD**

| #  | Search terms                                                                                                   | Number of hits |
|----|----------------------------------------------------------------------------------------------------------------|----------------|
| 1  | 'renal insufficiency, chronic'/exp OR 'renal insufficiency, chronic'                                           | 119,108        |
| 2  | 'kidney failure, chronic'/exp OR 'kidney failure, chronic'                                                     | 119,210        |
| 3  | 'kidney failure'/exp OR 'kidney failure'                                                                       | 338,896        |
| 4  | 'renal insufficiency'/exp OR 'renal insufficiency'                                                             | 343,721        |
| 5  | nephrop* OR kidney OR renal                                                                                    | 1,383,144      |
| 6  | (endstage OR 'end-stage') AND (renal OR kidney*)                                                               | 61,709         |
| 7  | Proteinuria* OR albuminuria* OR uremia* OR uraemia*                                                            | 119,894        |
| 8  | (kidney:ti,ab OR renal:ti,ab) AND (disease*:ti,ab OR failure*:ti,ab OR sufficien*:ti,ab OR insufficien*:ti,ab) | 426,131        |
| 9  | esrd:ti,ab OR eskd:ti,ab OR esrf:ti,ab OR ckf:ti,ab OR ckd:ti,ab OR crf:ti,ab OR crd:ti,ab                     | 74,498         |
| 10 | 'kidney diseases*'                                                                                             | 44,317         |
| 11 | #1 OR #2 OR #3 OR #4 OR #5 OR #6 OR #7 OR #8 OR #9 OR #10                                                      | 1,435,886      |
| 12 | 'health economics'                                                                                             | 67,562         |
| 13 | 'economic evaluation' OR 'economic evaluations'                                                                | 20,185         |
| 14 | 'fee'                                                                                                          | 41,122         |
| 15 | 'health care cost'                                                                                             | 162,806        |
| 16 | 'pharmacoeconomics'                                                                                            | 83,685         |
| 17 | 'drug cost'                                                                                                    | 69,204         |
| 18 | 'cost effectiveness analysis'/exp OR 'cost effectiveness':ab,ti OR cea:ab,ti                                   | 172,036        |
| 19 | cost:ab,ti OR costs:ab,ti OR costing:ab,ti                                                                     | 571,464        |
| 20 | (cost* NEAR/2 (effective* OR utility* OR benefit* OR minimi*)):ab,ti                                           | 169,719        |
| 21 | economic*:ab,ti OR pharmacoeconomic*:ab,ti                                                                     | 270,676        |
| 22 | expenditure*:ab,ti NOT energy:ab,ti                                                                            | 32,072         |
| 23 | (value NEAR/1 money):ab,ti                                                                                     | 31             |
| 24 | budget*:ab,ti                                                                                                  | 31,385         |
| 25 | #12 OR #13 OR #14 OR #15 OR #16 OR #17 OR #18 OR #19 OR #20 OR #21 OR #22 OR #23 OR #24                        | 1,039,866      |
| 26 | 'energy cost':ab,ti OR 'oxygen cost':ab,ti                                                                     | 3,773          |
| 27 | 'metabolic cost':ab,ti                                                                                         | 1,223          |
| 28 | 'energy expenditure':ab,ti OR 'oxygen expenditure':ab,ti                                                       | 26,595         |
| 29 | #26 OR #27 OR #28                                                                                              | 30,621         |
| 30 | #25 NOT #29                                                                                                    | 1,033,711      |
| 31 | 'quality adjusted life year*' OR 'quality-adjusted life year' OR QALY                                          | 24,040         |
| 32 | 'incremental cost effectiveness ratio*' OR ICER                                                                | 10,841         |
| 33 | 'life year' OR 'life-year'                                                                                     | 23,104         |
| 34 | #31 OR #32 OR #33                                                                                              | 30,100         |
| 35 | #30 AND #34                                                                                                    | 26,532         |
| 36 | #11 AND #35                                                                                                    | 1,437          |
| 37 | 'case study'/de OR 'case report' OR 'editorial'/de OR 'comment' OR 'letter'/de OR 'abstract report'/de         | 3,749,637      |
| 38 | #36 NOT #37                                                                                                    | 1,375          |
| 39 | #38 AND [english]/lim                                                                                          | 1,345          |

**Supplementary Table 3. Cochrane library search terms for studies of health economic models for the simulation of patients with CKD**

| #  | Search terms                                                                                                                                                           | Number of hits |
|----|------------------------------------------------------------------------------------------------------------------------------------------------------------------------|----------------|
| 1  | MeSH descriptor: [Renal Insufficiency, Chronic] explode all trees                                                                                                      | 4,700          |
| 2  | MeSH descriptor: [Kidney Failure, Chronic] explode all trees                                                                                                           | 3,894          |
| 3  | MeSH descriptor: [Renal Insufficiency] explode all trees                                                                                                               | 6,164          |
| 4  | nephrop* OR kidney OR renal                                                                                                                                            | 58,163         |
| 5  | (endstage OR 'end-stage') AND (renal or kidney*)                                                                                                                       | 3,363          |
| 6  | proteinuri* OR albuminuri* OR uremia* OR uraemia*                                                                                                                      | 6,127          |
| 7  | (kidney:ti,ab,kw OR renal:ti,ab,kw) AND (disease*:ti,ab,kw OR failure*:ti,ab,kw OR sufficien*:ti,ab,kw OR insufficien*:ti,ab,kw)                                       | 27,417         |
| 8  | esrd:ti,ab,kw OR eskd:ti,ab,kw OR esrf:ti,ab,kw OR ckf:ti,ab,kw OR ckd:ti,ab,kw OR crf:ti,ab,kw OR crd:ti,ab,kw                                                        | 4,042          |
| 9  | 'kidney diseases*'                                                                                                                                                     | 6,677          |
| 10 | #1 OR #2 OR #3 OR #4 OR #5 OR #6 OR #7 OR #8 OR #9                                                                                                                     | 60,111         |
| 11 | MeSH descriptor: [Health Care Costs] explode all trees                                                                                                                 | 7,438          |
| 12 | 'health economics' OR 'economic evaluation' OR 'drug costs' OR 'cost effectiveness analysis' (Word variations have been searched)                                      | 47,441         |
| 13 | 'cost effectiveness' OR 'cost-effectiveness' OR CEA (Word variations have been searched)                                                                               | 37,009         |
| 14 | cost OR costs OR costing (Word variations have been searched)                                                                                                          | 71,440         |
| 15 | 'cost effective*' OR 'cost utility*' OR 'cost benefit*' OR 'cost minimi*' OR economic* OR pharmacoeconomic* OR expenditure* NOT energy OR (value AND money) OR budget* | 67,678         |
| 16 | #11 or #12 or #13 or #14 or #15                                                                                                                                        | 81,516         |
| 17 | 'energy cost' OR 'oxygen cost' OR 'metabolic cost' OR 'energy expenditure' OR 'oxygen expenditure'                                                                     | 7,094          |
| 18 | #16 NOT #17                                                                                                                                                            | 77,091         |
| 19 | #10 AND #18                                                                                                                                                            | 4,903          |
| 20 | 'quality adjusted life year*' OR QALY                                                                                                                                  | 11,947         |
| 21 | 'incremental cost effectiveness ratio' OR ICER                                                                                                                         | 4,506          |
| 22 | #20 OR #21                                                                                                                                                             | 13,683         |
| 23 | #19 AND #22                                                                                                                                                            | 1,040          |

**Supplementary Table 4. EconLit search terms for studies of health economic models for the simulation of patients with CKD**

| #  | Search terms                                              | Number of hits |
|----|-----------------------------------------------------------|----------------|
| 1  | renal                                                     | 129            |
| 2  | kidney disease                                            | 53             |
| 3  | renal disease                                             | 71             |
| 4  | renal failure                                             | 28             |
| 5  | kidney failure                                            | 35             |
| 6  | end stage renal disease                                   | 49             |
| 7  | end stage kidney disease                                  | 11             |
| 8  | chronic renal disease                                     | 13             |
| 9  | chronic kidney failure                                    | 5              |
| 10 | nephropathy                                               | 8              |
| 11 | S1 OR S2 OR S3 OR S4 OR S5 OR S6 OR S7 OR S8 OR S9 OR S10 | 188            |

**Supplementary Table 5. Medline (PubMed) search terms for systematic review studies of health economic models for the simulation of patients with diabetes**

| #  | Search terms                                                                                                                             | Number of hits |
|----|------------------------------------------------------------------------------------------------------------------------------------------|----------------|
| 1  | Diabetes mellitus [MeSH Terms]                                                                                                           | 370,272        |
| 2  | diabet* OR diabetes OR NIDDM OR IDDM OR DM OR "insulin resistance" OR diabetolog*                                                        | 702,947        |
| 3  | #1 OR #2                                                                                                                                 | 702,947        |
| 4  | "economics, medical"[MeSH Terms]                                                                                                         | 13,978         |
| 5  | "economic evaluation" OR "economic evaluations"                                                                                          | 9,798          |
| 6  | "fee" or "fees"                                                                                                                          | 39,037         |
| 7  | "health care costs"[MeSH Terms]                                                                                                          | 56,165         |
| 8  | "drug costs"[MeSH Terms]                                                                                                                 | 14,173         |
| 9  | "cost-benefit analysis"[MeSH Terms] OR "cost effectiveness"[Text Word] OR "cost-effectiveness"[Title/Abstract] OR CEA[Title/Abstract]    | 113,077        |
| 10 | cost[Title/Abstract] OR costs[Title/Abstract] OR costing[Title/Abstract]                                                                 | 439,149        |
| 11 | "cost effective*"[Title/Abstract] OR "cost utilit*"[Title/Abstract] OR "cost benefit*"[Title/Abstract] OR "cost minimi*"[Title/Abstract] | 81,439         |
| 12 | economic*[Title/Abstract] OR pharmacoeconomic*[Title/Abstract]                                                                           | 231,540        |
| 13 | expenditure*[Title/Abstract] NOT energy[Title/Abstract]                                                                                  | 24,451         |
| 14 | value[Title/Abstract] AND money[Title/Abstract]                                                                                          | 2,470          |
| 15 | Budget*[Title/Abstract]                                                                                                                  | 24,807         |
| 16 | #4 OR #5 OR #6 OR #7 OR #8 OR #9 OR #10 OR #11 OR #12 OR #13 OR #14 OR #15                                                               | 726,718        |
| 17 | #3 AND #16                                                                                                                               | 22,413         |
| 18 | "quality adjusted life year*" OR "quality-adjusted life year" OR QALY                                                                    | 14,609         |
| 19 | "incremental cost effectiveness ratio*" OR ICER                                                                                          | 5,014          |
| 20 | "life year" OR "life-year"                                                                                                               | 6,013          |
| 21 | #18 OR #19 OR #20                                                                                                                        | 17,789         |
| 22 | #17 AND #21                                                                                                                              | 961            |
| 23 | #22 AND systematic [sb]                                                                                                                  | 147            |
| 24 | #23 AND English [Language]                                                                                                               | 144            |

**Supplementary Table 6. Medline (PubMed) search terms for systematic review studies of health economic models for the simulation of patients with hypertension**

| #  | Search terms                                                                                                                          | Number of hits |
|----|---------------------------------------------------------------------------------------------------------------------------------------|----------------|
| 1  | Hypertension [MeSH Terms]                                                                                                             | 235,015        |
| 2  | Blood Pressure, High OR Blood Pressures, High OR High Blood Pressure OR High Blood Pressures                                          | 551,466        |
| 3  | #1 OR #2                                                                                                                              | 551,466        |
| 4  | "economics, medical"[MeSH Terms]                                                                                                      | 13,976         |
| 5  | "economic evaluation" OR "economic evaluations"                                                                                       | 9,753          |
| 6  | "fee" or "fees"                                                                                                                       | 38892          |
| 7  | "health care costs"[MeSH Terms]                                                                                                       | 55976          |
| 8  | "drug costs"[MeSH Terms]                                                                                                              | 14135          |
| 9  | "cost-benefit analysis"[MeSH Terms] OR "cost effectiveness"[Text Word] OR "cost-effectiveness"[Title/Abstract] OR CEA[Title/Abstract] | 112,737        |
| 10 | cost[Title/Abstract] OR costs[Title/Abstract] OR costing[Title/Abstract]                                                              | 437,362        |
| 11 | "cost effective"[Title/Abstract] OR "cost utilit"[Title/Abstract] OR "cost benefit"[Title/Abstract] OR "cost minimi"[Title/Abstract]  | 81,117         |
| 12 | economic*[Title/Abstract] OR pharmacoeconomic*[Title/Abstract]                                                                        | 230,698        |
| 13 | expenditure*[Title/Abstract] NOT energy[Title/Abstract]                                                                               | 24,366         |
| 14 | value[Title/Abstract] AND money[Title/Abstract]                                                                                       | 2,461          |
| 15 | Budget*[Title/Abstract]                                                                                                               | 24,724         |
| 16 | #4 OR #5 OR #6 OR #7 OR #8 OR #9 OR #10 OR #11 OR #12 OR #13 OR #14 OR #15                                                            | 724,013        |
| 17 | #3 AND #16                                                                                                                            | 12,605         |
| 18 | "quality adjusted life year*" OR "quality-adjusted life year" OR QALY                                                                 | 14,540         |
| 19 | "incremental cost effectiveness ratio*" OR ICER                                                                                       | 4,987          |
| 20 | "life year" OR "life-year"                                                                                                            | 5,991          |
| 21 | #18 OR #19 OR #20                                                                                                                     | 17,714         |
| 22 | #17 AND #21                                                                                                                           | 376            |
| 23 | #22 AND systematic [sb]                                                                                                               | 41             |
| 24 | #23 AND English [Language]                                                                                                            | 40             |

**Supplementary Table 7. Eligibility criteria for the identification of studies of health economic models for the simulation of patients with CKD**

|                                     | <b>Inclusion criteria</b>                                                                                                                                                                          | <b>Exclusion criteria</b>                                                                                                                                                                 |
|-------------------------------------|----------------------------------------------------------------------------------------------------------------------------------------------------------------------------------------------------|-------------------------------------------------------------------------------------------------------------------------------------------------------------------------------------------|
| <b>Population</b>                   | Patients with/without CKD in whom CKD progression is evaluated (refer to Study design)<br>Adults                                                                                                   | Children and young people (under 18 years)<br>Animal studies                                                                                                                              |
| <b>Intervention and comparators</b> | Not applicable                                                                                                                                                                                     | Not applicable                                                                                                                                                                            |
| <b>Outcomes</b>                     | Model structure to include the progression of kidney disease and any health economic outcome, including (but not restricted to) QALYs, ICERs, LYG or costs                                         | Outcomes of interest not reported                                                                                                                                                         |
| <b>Study design</b>                 | Economic models that characterise CKD progression<br>Economic evaluation, pharmacoeconomic evaluation, cost-effectiveness study, cost-utility study, cost-benefit study or cost minimisation study | Randomized clinical trial, non-randomized clinical trial, prospective study, longitudinal study, retrospective study, guideline, cohort study, case reports, letter, editorial, retracted |
| <b>Language restrictions</b>        | English language only                                                                                                                                                                              | Studies published in languages other than English                                                                                                                                         |

*CKD: chronic kidney disease; ICER: incremental cost-effectiveness ratio; LYG: life years gained; QALY: quality-adjusted life year.*
