# Supplementary material for: Economic Modelling of Chronic Kidney Disease: A Systematic Literature Review to Inform Conceptual Model Design
Source: Springer Nature journal article supplement (doi:10.1007/s40273-019-00835-z), 2019-09-30

**ECONOMIC MODELLING OF CHRONIC KIDNEY DISEASE: A SYSTEMATIC LITERATURE  
REVIEW TO INFORM CONCEPTUAL MODEL DESIGN**

Daniel M Sugrue<sup>1</sup>, Thomas Ward<sup>1</sup>, Sukhvir Rai<sup>1</sup>, Phil McEwan<sup>1</sup>, Heleen GM van Haalen<sup>2</sup>

<sup>1</sup>Health Economics and Outcomes Research Limited, Cardiff, UK

<sup>2</sup>Global Health Economics, AstraZeneca, Gothenburg, Sweden

**Corresponding author**

Daniel M Sugrue

Health Economics and Outcomes Research Ltd

Rhymney House, Unit A Copse Walk, Cardiff Gate Business Park, Cardiff CF23 8RB

Email: [daniel.sugrue@heor.co.uk](mailto:daniel.sugrue@heor.co.uk)

Tel: +44 (0) 2920 399 146

Online Resource 2

Supplementary Figure 1. Overview of time to/time with ESRD modelling analysis framework

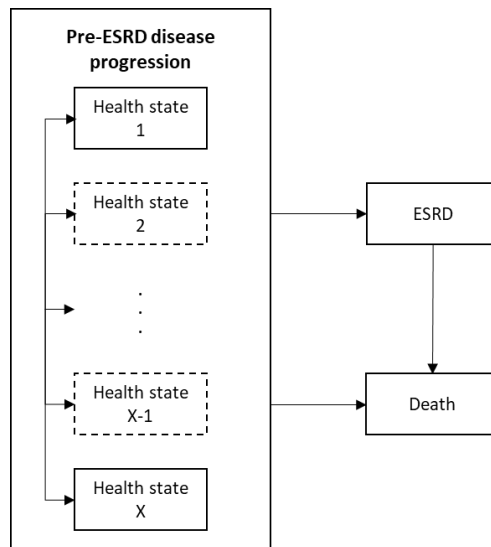

Supplement: MOESM2 [file 24130926]
