# Supplementary material for: Economic Modelling of Chronic Kidney Disease: A Systematic Literature Review to Inform Conceptual Model Design
Source: Springer Nature journal article supplement (doi:10.1007/s40273-019-00835-z), 2019-09-30
Supplement: MOESM4 [file 24130926]

**ECONOMIC MODELLING OF CHRONIC KIDNEY DISEASE: A SYSTEMATIC LITERATURE  
REVIEW TO INFORM CONCEPTUAL MODEL DESIGN**

Daniel M Sugrue<sup>1</sup>, Thomas Ward<sup>1</sup>, Sukhviri Rai<sup>1</sup>, Phil McEwan<sup>1</sup>, Heleen GM van Haalen<sup>2</sup>

<sup>1</sup>Health Economics and Outcomes Research Limited, Cardiff, UK

<sup>2</sup>Global Health Economics, AstraZeneca, Gothenburg, Sweden

**Corresponding author**

Daniel M Sugrue

Health Economics and Outcomes Research Ltd

Rhymney House, Unit A Copse Walk, Cardiff Gate Business Park, Cardiff CF23 8RB

Email: [daniel.sugrue@heor.co.uk](mailto:daniel.sugrue@heor.co.uk)

Tel: +44 (0) 2920 399 146

## Online Resource 4

**Supplementary Table 8. Summary of unique models: Model setting**

| Study                       | Year | Country     | Perspective                                     | Time horizon                | Type of analysis                     | Model type                     | Disease setting                                                                 | Research question                                                                                                                                                                                                                                                                                            |
|-----------------------------|------|-------------|-------------------------------------------------|-----------------------------|--------------------------------------|--------------------------------|---------------------------------------------------------------------------------|--------------------------------------------------------------------------------------------------------------------------------------------------------------------------------------------------------------------------------------------------------------------------------------------------------------|
| Boersma et al <sup>1</sup>  | 2010 | Netherlands | Healthcare                                      | 8 years                     | Cost-effectiveness and budget impact | Markov model                   | General population                                                              | Estimate the cost-effectiveness and budget impact of various population-based screen-and-treat scenarios for elevated albuminuria levels (i.e. microalbuminuria)                                                                                                                                             |
| Boulware et al <sup>2</sup> | 2003 | USA         | Societal                                        | NR                          | Cost-effectiveness                   | Markov decision analytic model | US patients with neither hypertension nor diabetes and adults with hypertension | Assess the value (QALY) of periodic, population-based dipstick screening for early detection of urine protein in adults with neither hypertension nor diabetes and in adults with hypertension                                                                                                               |
| Elbasha et al <sup>3</sup>  | 2017 | USA         | Third party payer                               | NR                          | Cost-effectiveness                   | Semi-Markov model              | Hepatitis C virus genotype 1 infection and CKD                                  | Cost-effectiveness of elbasvir/grazoprevir in treatment-naïve and treatment-experienced CKD patients compared with no treatment and pegylated interferon plus ribavirin using a computer-based model of the natural history of chronic hepatitis C virus genotype 1 infection, CKD and liver disease         |
| Erickson et al <sup>4</sup> | 2013 | USA         | Societal                                        | Lifetime                    | Cost-effectiveness                   | Markov model                   | CKD and hypertension                                                            | Cost-effectiveness of statins for primary prevention of myocardial infarction and stroke in patients with CKD                                                                                                                                                                                                |
| Ferguson et al <sup>5</sup> | 2017 | Canada      | Health payer                                    | 45 years or until death     | Cost-utility                         | Markov model                   | Canadian indigenous                                                             | Assess the cost utility of screening and subsequent treatment for CKD in rural Canadian indigenous adults by both eGFR and the urine albumin-to-creatinine ratio                                                                                                                                             |
| Hoerger et al <sup>6</sup>  | 2010 | USA         | Healthcare                                      | Age 50 to 90 years or death | Cost-effectiveness                   | Discrete microsimulation model | US patients                                                                     | Cost-effectiveness of screening for microalbuminuria followed by treatment with angiotensin converting enzyme inhibitors or angiotensin II-receptor blockers for African Americans and non-African Americans                                                                                                 |
| Howard et al <sup>7</sup>   | 2010 | Australia   | Healthcare                                      | Lifetime                    | Cost-effectiveness                   | Markov model                   | Patients with risk factors (diabetes, hypertension and proteinuria)             | Assessed, from the perspective of a health-care funder, the health outcomes (measured in terms of QALYs) and incremental costs of intensive management of patients known to have diabetes and hypertension, with and without early detection of new patients at risk for CKD, compared with current practice |
| Levy et al <sup>8</sup>     | 2014 | USA         | NR                                              | 30 years                    | Cost-effectiveness                   | Markov model                   | CKD                                                                             | Predict the timing and number of cases of end-stage renal disease, survival and QALYs occurring over the projected lifetime of a cohort of hypothetical CKD patients based on a range of baseline eGFR values and of rates of eGFR decline                                                                   |
| Nuijten et al <sup>9</sup>  | 2010 | UK          | NHS (separate analysis performed from societal) | 10 years                    | Cost-effectiveness                   | Markov model                   | CKD with secondary hyperparathyroidism                                          | Assess the cost effectiveness of paricalcitol for secondary hyperparathyroidism in CKD compared with alfacalcidol                                                                                                                                                                                            |

|                                                                                                                                                                                                                                            |      |       |                   |          |                    |                                |                                        |                                                                                                                                                               |
|--------------------------------------------------------------------------------------------------------------------------------------------------------------------------------------------------------------------------------------------|------|-------|-------------------|----------|--------------------|--------------------------------|----------------------------------------|---------------------------------------------------------------------------------------------------------------------------------------------------------------|
|                                                                                                                                                                                                                                            |      |       | perspective)      |          |                    |                                |                                        |                                                                                                                                                               |
| Nuijten et al <sup>10</sup>                                                                                                                                                                                                                | 2009 | USA   | Third party payer | 11 years | Cost-effectiveness | Markov model                   | CKD with secondary hyperparathyroidism | Cost-effectiveness of paricalcitol versus calcitriol for the treatment of secondary hyperparathyroidism in patients with CKD                                  |
| Okubo et al <sup>11</sup>                                                                                                                                                                                                                  | 2015 | Japan | Societal          | Lifetime | Cost-effectiveness | Decision tree and Markov model | CKD or diabetes                        | Cost-effectiveness of obstructive sleep apnea screening for patients with diabetes or CKD                                                                     |
| Orlando et al <sup>12</sup>                                                                                                                                                                                                                | 2011 | USA   | NR                | Lifetime | NR                 | Markov model                   | CKD                                    | Evaluate the impact of 7 different treatment strategies on outcomes including QALYs, mortality, cardiovascular disease, disease progression, and bone disease |
| Schlackow et al <sup>13</sup>                                                                                                                                                                                                              | 2017 | UK    | NR                | 5 years  | Cost-effectiveness | Markov model                   | CKD and cardiovascular disease         | Long-term policy model of cardiovascular disease in moderate-to-advanced CKD                                                                                  |
| <p><i>ACEI: angiotensin converting enzyme inhibitor; CKD: chronic kidney disease; eGFR: estimated glomerular filtration rate; NA: not applicable; NHS: National Health System; NR: not reported; QALY: quality-adjusted life year.</i></p> |      |       |                   |          |                    |                                |                                        |                                                                                                                                                               |

**Supplementary Table 9. Summary of unique models: health states, disease progression, CV events and discount rates**

| Study                        | Health states related to kidney disease                                                                                                                                                                                     | Approach used to model CKD progression                  | Approach used to model CV events                                                                                                                              | Discounting |
|------------------------------|-----------------------------------------------------------------------------------------------------------------------------------------------------------------------------------------------------------------------------|---------------------------------------------------------|---------------------------------------------------------------------------------------------------------------------------------------------------------------|-------------|
| Boersma et al <sup>1</sup>   | Low normo-albuminuria, high normo-albuminuria, microalbuminuria, macro-albuminuria, dialysis, death                                                                                                                         | Transition probabilities UAE                            | Probability of MI, derived from Dutch Renal Registry                                                                                                          | 4% and 1.5% |
| Boulware et al <sup>2</sup>  | Normal kidney function CKD 1, CKD 2-4, CKD 5, death                                                                                                                                                                         | Annual rate of eGFR decline                             | NR                                                                                                                                                            | 3%          |
| Elbasha et al <sup>3*</sup>  | CKD 1, CKD 2, CKD 3A, CKD 3B, CKD 4, CKD 5, haemodialysis, kidney transplant                                                                                                                                                | Transition probabilities                                | Risk of stroke and MI, dependent on CKD stage                                                                                                                 | NR          |
| Erickson et al <sup>4</sup>  | CKD 3a + 3b, CKD 4, ESRD, death                                                                                                                                                                                             | Annual rate of eGFR decline                             | Probability of MI, stroke, myopathy, partly derived from Framingham risk scores                                                                               | 3%          |
| Ferguson et al <sup>5</sup>  | CKD 1a-2b, CKD 3a, CKD 3b, CKD 4, kidney failure, dialysis, surviving with kidney transplant, death                                                                                                                         | Transition probabilities                                | NR                                                                                                                                                            | 5%          |
| Hoerger et al <sup>6</sup>   | no CKD, CKD 1, CKD 2, CKD 3, CKD 4, CKD 5, death                                                                                                                                                                            | Annual GFR decrement and transition rates               | Probability of MI, stroke and CAD, derived from Framingham risk scores                                                                                        | 3%          |
| Howard et al <sup>7</sup>    | Diabetes normoalbuminuria ± hypertension, diabetes microalbuminuria ± hypertension, diabetes macroalbuminuria ± hypertension, hypertension ± proteinuria, Proteinuria, CKD, ESRD requiring RRT, dialysis, transplant, death | Relative risk of progression                            | Relative risk of CV event of CV death, derived from randomized trials                                                                                         | 5%          |
| Levy et al <sup>8</sup>      | Functioning kidney: CKD 3a, CKD 3b, CKD 4, CKD 5<br>Kidney failure: dialysis, transplant<br>Death                                                                                                                           | Annual eGFR decline<br>Transition probabilities to ESRD | NR                                                                                                                                                            | 3%          |
| Nuijten et al <sup>9</sup>   | CKD 1, CKD 2, CKD 3, CKD 4, CKD 5, transplant, death                                                                                                                                                                        | Transition probabilities                                | NR                                                                                                                                                            | 3.5%        |
| Nuijten et al <sup>10</sup>  | CKD 1, CKD 2, CKD 3, CKD 4, CKD 5, transplant, death                                                                                                                                                                        | Transition probabilities                                | NR                                                                                                                                                            | 3.5%        |
| Okubo et al <sup>11</sup>    | CKD patients: screened and/or examined CKD ESRD, cardiovascular disease, death<br>Diabetes patients: screened and/or examined diabetes, ESRD, death                                                                         | Transition probabilities                                | NR                                                                                                                                                            | 3%          |
| Orlando et al <sup>12*</sup> | No CKD no risk, No CKD high risk, CKD 1, CKD 2, CKD 3, CKD 4, CKD 5, dialysis, transplant, dead                                                                                                                             | Monthly GFR changes                                     | Probability of MI (dependent on cardiovascular disease state).<br>Probability of stroke (dependent on CKD stage)<br>Probability of hypertension (dependent on | 3%          |

|                                                                                                                                                                                                                                                                                                                                                                        |                                                       |                |            |    |
|------------------------------------------------------------------------------------------------------------------------------------------------------------------------------------------------------------------------------------------------------------------------------------------------------------------------------------------------------------------------|-------------------------------------------------------|----------------|------------|----|
|                                                                                                                                                                                                                                                                                                                                                                        |                                                       |                | CKD stage) |    |
| Schlackow et al <sup>13</sup>                                                                                                                                                                                                                                                                                                                                          | CKD 3B, CKD 4, CKD 5 not on RRT, dialysis, transplant | Risk equations | NR         | NR |
| <p><i>CKD: chronic kidney disease; CV: cardiovascular; eGFR: estimated glomerular filtration rate; ESRD: end-stage renal disease; KT: kidney transplant; MI: myocardial infarction; NA: not applicable; NR: not reported; RRT: renal replacement therapy; UAE: urinary albumin secretion.</i></p> <p><i>* Studies included additional non-renal health states.</i></p> |                                                       |                |            |    |

**Supplementary Table 10. Summary of unique models: Sensitivity analyses and drivers of cost effectiveness**

| Study                         | Sensitivity analyses            | Drivers of cost-effectiveness                                                                                                                                                                                                                                                                           | Validation                                                                                                                                                                                                                                                                                                                                                                                                                           |
|-------------------------------|---------------------------------|---------------------------------------------------------------------------------------------------------------------------------------------------------------------------------------------------------------------------------------------------------------------------------------------------------|--------------------------------------------------------------------------------------------------------------------------------------------------------------------------------------------------------------------------------------------------------------------------------------------------------------------------------------------------------------------------------------------------------------------------------------|
| Boersma et al <sup>1</sup>    | Probabilistic and one-way       | CV morbidity cost estimate, lowering or increasing the costs of pre-screening on urinary albumin concentration, costs for the urinary albumin excretion confirmation test, and costs of angiotensin-converting enzyme inhibitor treatment                                                               | NR                                                                                                                                                                                                                                                                                                                                                                                                                                   |
| Boulware et al <sup>2</sup>   | One-way                         | Age when screening begins, frequency of screening                                                                                                                                                                                                                                                       | Compared model output with nationally available data on disease incidence and mortality                                                                                                                                                                                                                                                                                                                                              |
| Elbasha et al <sup>3</sup>    | Deterministic and probabilistic | Changes in discount rates, impact of Hepatitis C virus on CKD progression or death, death from hepatocellular carcinoma and utility following sustained virologic response                                                                                                                              | Several tests were built into the model for verification and to ensure internal validity e.g. the sum of the distribution of persons in each health state at the end of each cycle was verified to be equal to 1 both numerically                                                                                                                                                                                                    |
| Erickson et al <sup>4</sup>   | Probabilistic                   | The range of rhabdomyolysis risk in CKD, cardiovascular risk, severity of CKD upon initiation, and relative risk reduction in CKD progression                                                                                                                                                           | Compared life expectancies produced from each patient group to U.S. life tables, demonstrating stepwise decreases following additions of hypertension, non-progressive CKD, and progressive CKD                                                                                                                                                                                                                                      |
| Ferguson et al <sup>5</sup>   | One-way                         | Rate of progression to ESRD, prevalence of albuminuria                                                                                                                                                                                                                                                  | Compared life tables in Manitoba's indigenous population with the life expectancy determined in the Markov simulation                                                                                                                                                                                                                                                                                                                |
| Hoerger et al <sup>6</sup>    | One-way                         | Micro-albuminuria incidence, treatment adherence, discount rate                                                                                                                                                                                                                                         | Validated the model according to recommended standards outlined by the International Society for Pharmacoeconomics and Outcomes Research (ISPOR) Task Force                                                                                                                                                                                                                                                                          |
| Howard et al <sup>7</sup>     | One-way and probabilistic       | NR                                                                                                                                                                                                                                                                                                      | NR                                                                                                                                                                                                                                                                                                                                                                                                                                   |
| Levy et al <sup>8</sup>       | One-way                         | Time horizon and to a lesser extent, age at entry; the number per 1,000 reaching ESRD is most sensitive to the HR for eGFR and the time horizon; and the cost per QALY is most sensitive to the HR for ESRD and the daily treatment cost                                                                | Model verification included testing for internal consistency using extensive debugging and testing extreme conditions                                                                                                                                                                                                                                                                                                                |
| Nuijten et al <sup>9</sup>    | One-way and probabilistic       | Variables were input variables related to proteinuria (progression to proteinuria, mortality with proteinuria)                                                                                                                                                                                          | NR                                                                                                                                                                                                                                                                                                                                                                                                                                   |
| Nuijten et al <sup>10</sup>   | One-way and probabilistic       | Variables were input variables related to proteinuria (progression to proteinuria, mortality with proteinuria)                                                                                                                                                                                          | Subjected to internal testing and debugging, as well as being calibrated against NHANES data                                                                                                                                                                                                                                                                                                                                         |
| Okubo et al <sup>11</sup>     | One-way                         | Change of utility weight with CPAP treatment                                                                                                                                                                                                                                                            | NR                                                                                                                                                                                                                                                                                                                                                                                                                                   |
| Orlando et al <sup>12</sup>   | One-way                         | No variables were identified that significantly changed the outcome results when varied across their plausible range                                                                                                                                                                                    | To externally validate the CKD model, the model's cohort was altered to reflect participants of two different published studies, Go (2004) and in Wright (2002, AASK trial), and model's projections were compared.                                                                                                                                                                                                                  |
| Schlackow et al <sup>13</sup> | NR                              | Model-simulated cumulative rates of cardiovascular endpoints (all participants) and progression to RRT (those not on RRT at entry) were internally validated through comparison with the 5-year Kaplan-Meier product-limit estimates in SHARP, across all participants, and in subgroups by CKD status. | SHARP participants were followed for an average of 5 years and hence the longer-term predictions are guided by the model structure and parametric proportional hazards assumptions. SHARP excluded patients with major coronary disease, whereas in routine clinical practice coronary heart disease is highly prevalent in moderate-to-advanced CKD. Future model developments could consider further disease markers and endpoints |

*CKD: chronic kidney disease; CV: cardiovascular; eGFR: estimated glomerular filtration rate; ESRD: end stage renal disease; HR: hazard ratio; NHANES: National Health and Nutrition Examination Survey; NR: not reported; QALY: quality-adjusted life year; RRT: renal replacement therapy; SHARP: Study of Heart and Renal Protection.*

## References

1. Boersma C, Gansevoort RT, Pechlivanoglou P, et al. Screen-and-treat strategies for albuminuria to prevent cardiovascular and renal disease: cost-effectiveness of nationwide and targeted interventions based on analysis of cohort data from the Netherlands. *Clin Ther.* 2010;32(6):1103-21.
2. Boulware LE, Jaar BG, Tarver-Carr ME, et al. Screening for proteinuria in US adults: a cost-effectiveness analysis. *Jama.* 2003;290(23):3101-14.
3. Elbasha E, Greaves W, Roth D, et al. Cost-effectiveness of elbasvir/grazoprevir use in treatment-naïve and treatment-experienced patients with hepatitis C virus genotype 1 infection and chronic kidney disease in the United States. *J Viral Hepat.* 2017;24(4):268-79.
4. Erickson KF, Japa S, Owens DK, et al. Cost-effectiveness of statins for primary cardiovascular prevention in chronic kidney disease. *J Am Coll Cardiol.* 2013;61(12):1250-8.
5. Ferguson TW, Tangri N, Tan Z, et al. Screening for chronic kidney disease in Canadian indigenous peoples is cost-effective. *Kidney Int.* 2017;92(1):192-200.
6. Hoerger TJ, Wittenborn JS, Segel JE, et al. A health policy model of CKD: 2. The cost-effectiveness of microalbuminuria screening. *Am J Kidney Dis.* 2010;55(3):463-73.
7. Howard K, White S, Salkeld G, et al. Cost-effectiveness of screening and optimal management for diabetes, hypertension, and chronic kidney disease: a modeled analysis. *Value Health.* 2010;13(2):196-208.
8. Levy AR, Perkins RM, Johnston KM, et al. An epidemiologic model to project the impact of changes in glomerular filtration rate on quality of life and survival among persons with chronic kidney disease. *Int J Nephrol Renovasc Dis.* 2014;7:271-80.
9. Nuijten M, Andress DL, Marx SE, et al. Cost Effectiveness of Paricalcitol versus a non-selective vitamin D receptor activator for secondary hyperparathyroidism in the UK: a chronic kidney disease markov model. *Clin Drug Investig.* 2010;30(8):545-57.
10. Nuijten M, Andress DL, Marx SE, et al. Chronic kidney disease Markov model comparing paricalcitol to calcitriol for secondary hyperparathyroidism: a US perspective. *Curr Med Res Opin.* 2009;25(5):1221-34.
11. Okubo R, Kondo M, Hoshi SL, et al. Cost-effectiveness of obstructive sleep apnea screening for patients with diabetes or chronic kidney disease. *Sleep Breath.* 2015;19(3):1081-92.

12. Orlando LA, Belasco EJ, Patel UD, et al. The chronic kidney disease model: a general purpose model of disease progression and treatment. *BMC Med Inform Decis Mak.* 2011;11:41.
13. Schlackow I, Kent S, Herrington W, et al. A policy model of cardiovascular disease in moderate-to-advanced chronic kidney disease. *Heart.* 2017.
