# Supplementary material for: Economic Modelling of Chronic Kidney Disease: A Systematic Literature Review to Inform Conceptual Model Design
Source: Springer Nature journal article supplement (doi:10.1007/s40273-019-00835-z), 2019-09-30
Supplement: MOESM6 [file 24130926]

**ECONOMIC MODELLING OF CHRONIC KIDNEY DISEASE: A SYSTEMATIC LITERATURE  
REVIEW TO INFORM CONCEPTUAL MODEL DESIGN**

Daniel M Sugrue<sup>1</sup>, Thomas Ward<sup>1</sup>, Sukhviri Rai<sup>1</sup>, Phil McEwan<sup>1</sup>, Heleen GM van Haalen<sup>2</sup>

<sup>1</sup>Health Economics and Outcomes Research Limited, Cardiff, UK

<sup>2</sup>Global Health Economics, AstraZeneca, Gothenburg, Sweden

**Corresponding author**

Daniel M Sugrue

Health Economics and Outcomes Research Ltd

Rhymney House, Unit A Copse Walk, Cardiff Gate Business Park, Cardiff CF23 8RB

Email: [daniel.sugrue@heor.co.uk](mailto:daniel.sugrue@heor.co.uk)

Tel: +44 (0) 2920 399 146

## Online Resource 6

**Supplementary Table 14. Summary of unique models: Model setting**

| Study                                          | Year | Country           | Perspective         | Time horizon               | Type of analysis                    | Model type                               | Disease setting                       | Research question                                                                                                                                                                                                                                                                                                                                                                              |
|------------------------------------------------|------|-------------------|---------------------|----------------------------|-------------------------------------|------------------------------------------|---------------------------------------|------------------------------------------------------------------------------------------------------------------------------------------------------------------------------------------------------------------------------------------------------------------------------------------------------------------------------------------------------------------------------------------------|
| Adarkwah et al. <sup>1</sup>                   | 2010 | Germany           | Health insurance    | 50 years, or until age 100 | Cost-utility                        | Markov model                             | Type 2 diabetes                       | Assess the most cost-effective time to start an ACEI (or an ARB if coughing as a side effect occurs) in patients with newly diagnosed type 2 diabetes                                                                                                                                                                                                                                          |
| Airoldi et al. <sup>2</sup>                    | 2008 | UK                | Primary Care Trusts | 5 years                    | Cost-effectiveness                  | Markov chain                             | Type 1 diabetes                       | Outline framework that estimates health benefits and costs of different interventions in their populations; shows how modes produce estimates in a way that is transparent to commissioners                                                                                                                                                                                                    |
| Bagust et al. <sup>3</sup>                     | 2001 | UK and USA        | NR                  | NR                         | NR                                  | Markov chain                             | Type 2 diabetes                       | Develop long-term economic model of health care for type 2 diabetes                                                                                                                                                                                                                                                                                                                            |
| Beckwith et al. <sup>4</sup>                   | 2012 | USA and Australia | NR                  | 20-year follow-up          | Cost-effectiveness                  | Markov model and Monte Carlo simulations | Type 1 diabetes                       | Perform a cost-effectiveness analysis comparing inlet transplantation with standard insulin therapy using Markov modelling and Monte Carlo simulations                                                                                                                                                                                                                                         |
| Bertram et al. <sup>5</sup>                    | 2010 | Australia         | Healthcare          | Lifetime                   | Cost-effectiveness                  | Discrete-time micro-simulation model     | Pre-diabetes                          | Evaluate the cost-effectiveness of a screening programme for pre-diabetes, which was followed up by treatment with pharmaceutical interventions or lifestyle interventions in order to prevent or slow the onset of diabetes in those at high risk                                                                                                                                             |
| Boehringer Ingelheim Ltd (TA336 <sup>6</sup> ) | 2014 | UK                | NHS                 | Lifetime                   | 6 months                            | Micro-simulation                         | Type 2 diabetes                       | Asses the cost-effectiveness of empagliflozin for treating patients with type 2 diabetes                                                                                                                                                                                                                                                                                                       |
| Brown et al. <sup>7</sup>                      | 2000 | USA               | NR                  | NR                         | 1 year                              | Micro-simulation                         | Type 2 diabetes                       | Document the architecture, assumptions, and features of Release 3.0 of the user-friendly version of the global diabetes model (GDM)                                                                                                                                                                                                                                                            |
| Campbell et al. <sup>8</sup>                   | 2007 | USA               | Health payer        | 8 years                    | Cost-effectiveness                  | Markov model                             | Type 2 diabetes                       | Determine the incremental cost-effectiveness ratios of ACEI initiation in normoalbuminuric, microalbuminuric and macroalbuminuric patients with newly diagnosed type 2 diabetes                                                                                                                                                                                                                |
| Caro et al. <sup>9</sup>                       | 2000 | USA               | Payer               | 95 years                   | Cost-consequence                    | Adapted Eastman model (1997)             | Type 2 diabetes                       | Assess the economic efficiency of adding troglitazone to sulfonylurea therapy to improve glycemic control                                                                                                                                                                                                                                                                                      |
| Chen et al. <sup>10</sup>                      | 2001 | Taiwan            | NR                  | NR                         | Cost-effectiveness and cost-utility | Markov Monte Carlo simulation model      | Type 2 diabetes                       | Develop disease natural history of type 2 diabetes; quantify efficacy of early detection of type 2 diabetes in slowing or reducing the progression of major complications; evaluate the effect of inter-screening interval and age at start of screening; compare the cost effectiveness of organized screening; assess cost-effectiveness of type 2 diabetes screening by age-specific groups |
| Chen et al. <sup>11</sup>                      | 2008 | USA               | NR                  | Death or age 100 years     | Cost-effectiveness                  | Discrete-event simulation model          | Type 2 diabetes                       | Project the long-term impacts on life expectancy and occurrence over 5, 10, and 40 years of microvascular and macrovascular complications of diabetes when using different haemoglobin A1c (HbA1c) thresholds for intensifying treatment of type 2 diabetes                                                                                                                                    |
| Clark et al. <sup>12</sup>                     | 2000 | Canada            | Government          | 21-year follow-up          | Cost-utility                        | Decision analysis tree                   | Type 1 diabetes with macroproteinuria | Perform a cost-utility analysis from the government's perspective to see whether the province or territory should pay for ACEIs for type I diabetic nephropathy                                                                                                                                                                                                                                |
| Clarke et al. <sup>13</sup>                    | 2004 | UK                | NR                  | NR                         | NR                                  | Simulation model                         | Type 2 diabetes                       | Develop a simulation model for type 2 diabetes that can be used to                                                                                                                                                                                                                                                                                                                             |

|                                |      |                  |                            |                       |                                                                        |                                                                                    |                            |                                                                                                                                                                                                                                |
|--------------------------------|------|------------------|----------------------------|-----------------------|------------------------------------------------------------------------|------------------------------------------------------------------------------------|----------------------------|--------------------------------------------------------------------------------------------------------------------------------------------------------------------------------------------------------------------------------|
|                                |      |                  |                            |                       |                                                                        |                                                                                    |                            | estimate the likely occurrence of major diabetes-related complications over a lifetime                                                                                                                                         |
| Dall et al. <sup>14</sup>      | 2015 | USA              | Societal                   | 10 years              | NR                                                                     | Markov model                                                                       | Pre-type 2 diabetes        | Illustrate the potential clinical and economic benefits of treating prediabetes with lifestyle intervention to prevent or delay onset of type 2 diabetes and sequelae                                                          |
| Dong et al. <sup>15</sup>      | 2004 | USA              | Single payer               | Death or age 95 years | Cost-effectiveness                                                     | Semi-Markov model                                                                  | Type 1 diabetes            | Examine the cost effectiveness of treating adults aged over 20 years with an ACEI (captopril) immediately following diagnosis of type 1 diabetes versus treating them after the onset of microalbuminuria                      |
| Eastman et al. <sup>16</sup>   | 1997 | USA              | Single payer               | Lifetime              | Cost-effectiveness                                                     | Markov model                                                                       | Type 2 diabetes            | Develop a model of NIDDM for analysing prevention strategies for NIDDM                                                                                                                                                         |
| Eddy et al. <sup>17</sup>      | 2003 | USA              | NA                         | NR                    | NA                                                                     | Object-oriented approach, differential equations, and a construct called “features | Type 1 and type 2 diabetes | Build a mathematical model of the anatomy, pathophysiology, tests, treatments, and outcomes pertaining to diabetes that could be applied to a wide variety of clinical and administrative problems and that could be validated |
| Garattini et al. <sup>18</sup> | 1997 | Italy            | Italian NHS                | 10 years              | Cost-effectiveness                                                     | Decision model                                                                     | Type 1 diabetes            | Evaluate the likely cost savings associated with using an ACEI in patients with IDDM and proteinuria                                                                                                                           |
| Golan et al. <sup>19</sup>     | 1999 | USA              | Societal                   | Lifetime              | Cost-effectiveness                                                     | Markov model                                                                       | Type 2 diabetes            | Evaluate the cost-effectiveness of treating all patients with type 2 diabetes                                                                                                                                                  |
| Grima et al. <sup>20</sup>     | 2007 | Canada           | Public healthcare payer    | 36 years              | Cost-effectiveness                                                     | State-transition model                                                             | Type 1 and type 2 diabetes | Assess the cost effectiveness of insulin glargine compared with NPH insulin in patients with type 1 or 2 diabetes who had inadequate glycaemic control                                                                         |
| Hayashino et al. <sup>21</sup> | 2010 | Japan            | Societal                   | Lifetime              | NR                                                                     | Markov model                                                                       | Diabetes with CKD 3 or 4   | Evaluate the cost-effectiveness of using AST-120 to treat patients with type 2 diabetes and advanced-stage CKD                                                                                                                 |
| Hayes et al. <sup>22</sup>     | 2013 | UK and Australia | NR                         | NR                    | NA                                                                     | Simulation model                                                                   | Type 2 diabetes            | Build a new version of the United Kingdom Prospective Diabetes Study (UKPDS) Outcomes Model (UKPDS-OM1), a patient-level simulation tool for predicting lifetime health outcomes of people with type 2 diabetes mellitus       |
| Hoerger et al. <sup>23</sup>   | 2004 | USA              | Health care system         | Lifetime              | Cost-effectiveness                                                     | Markov model                                                                       | Type 2 diabetes            | Estimate the incremental cost-effectiveness of type 2 diabetes screening strategies: screening targeted to people with hypertension and universal screening                                                                    |
| Kiberd et al. <sup>24</sup>    | 1995 | Canada           | Third party and government | 60 years              | Cost-effective and cost-utility are used interchangeably in the report | Markov model                                                                       | Type 1 diabetes            | Examine the conditions necessary to make screening for microalbuminuria in patients with insulin dependent diabetes mellitus cost effective                                                                                    |
| McEwan et al. <sup>25</sup>    | 2016 | UK               | NR                         | 80 years              | NR                                                                     | Simulation model                                                                   | Type 1 diabetes            | Quantify the individual and combined contribution of changes in hypoglycaemia frequency, weight and HbA1c to predicted QALYs within a type 1 diabetes population                                                               |
| McEwan et al. <sup>26</sup>    | 2006 | UK               | NR                         | 20 years or 60 years  | Cost-effectiveness and cost-utility                                    | Simulation model                                                                   | Type 2 diabetes            | Determine the mean costs and outcomes associated with modifiable risk factors in patients with type 2 diabetes and to determine equivalent changes to these risk factors in terms of financial costs and health outcomes       |
| McEwan et al. <sup>27</sup>    | 2007 | UK               | NHS                        | 40 years              | Cost-utility                                                           | Discrete event simulation model                                                    | Type 1 diabetes            | Evaluate relative cost-effectiveness of insulin glargine versus NPH insulin for the treatment of type 2 diabetes                                                                                                               |
| McQueen et al. <sup>28</sup>   | 2011 | USA              | Societal                   | 33 years              | Cost-effectiveness                                                     | Markov model                                                                       | Type 1 diabetes            | Determine the cost-effectiveness of Continuous Glucose Monitoring (CGM) technology with intensive insulin therapy compared to self-monitoring of blood glucose (SMBG) in adults with type 1 diabetes                           |

|                                     |       |                                                         |                              |                                                                     |                                     |                                                                                   |                                                            |                                                                                                                                                                                                                                                                                              |
|-------------------------------------|-------|---------------------------------------------------------|------------------------------|---------------------------------------------------------------------|-------------------------------------|-----------------------------------------------------------------------------------|------------------------------------------------------------|----------------------------------------------------------------------------------------------------------------------------------------------------------------------------------------------------------------------------------------------------------------------------------------------|
| Mueller et al. <sup>29</sup>        | 2006  | Germany, UK, Belgium, USA                               | NR                           | NR                                                                  | NR                                  | Discrete event Monte-Carlo simulation application. A Markov process (with memory) | Type 1 and type 2 diabetes                                 | Develop and validate the EAGLE model to provide a flexible and comprehensive tool for the simulation of the long-term effects of diabetes treatment and related costs in type 1 and type 2 diabetes                                                                                          |
| Nagy et al. <sup>30</sup>           | 2016  | Hungary                                                 | Policymaker                  | Lifetime                                                            | Cost-effectiveness                  | Markov model                                                                      | Type 2 diabetic and non-diabetic populations               | Develop a long-term economic model for type 2 diabetes to describe the entire spectrum of the disease over a wide range of healthcare programmes                                                                                                                                             |
| Palmer et al. <sup>31</sup>         | 2000  | Switzerland                                             | Swiss Health insurance payer | Lifetime                                                            | Cost-effectiveness                  | Markov model                                                                      | Type 1 diabetes                                            | Determine the health outcomes and economic consequences of different combinations of diabetes interventions in newly diagnosed patients with type 1 (insulin-dependent) diabetes in Switzerland                                                                                              |
| Palmer et al. <sup>32</sup>         | 2004a | Switzerland and USA                                     | Adaptable                    | Between 1 and 90 years                                              | NR                                  | Markov model                                                                      | Type 1 and type 2 diabetes                                 | Develop an internet-based, interactive computer model to determine the long-term health outcomes and economic consequences of implementing different treatment policies or interventions in type 1 and type 2 diabetes mellitus                                                              |
| Palmer et al. <sup>33</sup>         | 2004b | Switzerland, Belgium, France, USA, Netherlands, Denmark | Third party payer            | NR                                                                  | Cost-effectiveness                  | Markov model                                                                      | Type 2 diabetes (hypertensive patients with renal disease) | Determine the most cost-effective time point for initiation of irbesartan treatment in hypertensive patients with type 2 diabetes and renal disease                                                                                                                                          |
| Palmer et al. <sup>34</sup>         | 2006  | France                                                  | Third party health           | 25 years                                                            | Cost-consequence                    | Markov model                                                                      | Type 2 diabetes (hypertensive patients)                    | Assess the health economic impact of nephropathy screening in hypertensive patients with type 2 diabetes followed by optimal antihypertensive/nephroprotective therapy in those who have nephropathy                                                                                         |
| Rodby et al. <sup>35</sup>          | 2003  | Switzerland, USA, France, Belgium                       | Healthcare                   | 3, 10 and 25 years                                                  | Cost-effectiveness                  | Markov Model                                                                      | Type 2 diabetes (hypertensive patients with nephropathy)   | Estimate the cost-effectiveness of irbesartan compared with placebo or amlodipine in the treatment of patients with type 2 diabetes, hypertension and overt nephropathy                                                                                                                      |
| Rodby et al. <sup>36</sup>          | 1996  | USA                                                     | Payer                        | 31 years for patients with IDDM<br>12 years for patients with NIDDM | Cost-benefit and cost-effectiveness | Markov-type decision analysis model                                               | Type 1 and 2 diabetes                                      | Determine the cost-benefit and cost-effectiveness of captopril as a therapy in patients with IDDM as well as the potential savings for all patients with diabetes and nephropathy                                                                                                            |
| Sakthong et al. <sup>37</sup>       | 2001  | Thailand                                                | NR                           | 25 years                                                            | Cost-effectiveness                  | Markov model                                                                      | Type 2 diabetes                                            | Assess the cost-effectiveness of prescribing ACEI to delay progression of diabetic nephropathy in normotensive patients with type 2 diabetes and microalbuminuria                                                                                                                            |
| Shearer et al. <sup>38</sup>        | 2004  | UK                                                      | Societal and patient         | 10 years                                                            | Cost-effectiveness                  | Markov model                                                                      | Type 1 diabetes                                            | Determine the cost-effectiveness of a structured treatment and teaching programme combining dietary freedom with insulin adjustment for type 1 diabetes                                                                                                                                      |
| Smith et al. <sup>39</sup>          | 2004  | USA                                                     | Third party payer            | 8 years                                                             | Cost-effectiveness                  | Markov model                                                                      | Type 2 diabetes                                            | Estimate 8-year health and economic outcomes of the angiotensin II receptor blocker valsartan versus the calcium channel blocker amlodipine in therapy of patients with type 2 diabetes and microalbuminuria based on clinical endpoints from a 6-month randomized controlled clinical trial |
| Srisubat et al. <sup>40</sup>       | 2014  | Thailand                                                | Socioeconomic                | Lifetime                                                            | Cost-effectiveness                  | Markov model                                                                      | Type 2 diabetes                                            | Assess the cost-effectiveness of annual microalbuminuria screening in type 2 diabetic patients                                                                                                                                                                                               |
| Steen Carlsson et al. <sup>41</sup> | 2014  | Sweden                                                  | Societal                     | 40 years                                                            | Cost-effectiveness                  | Markov model                                                                      | Type 2 diabetes                                            | Evaluate long-run cost-effectiveness in a Swedish setting for liraglutide compared with sulphonylureas (glimepiride) or sitagliptin, all as add-on to metformin for patients with type 2 diabetes insufficiently controlled with metformin in monotherapy                                    |
| CDC Diabetes Cost-effectiveness     | 2002  | USA                                                     | Health care system           | NR                                                                  | Cost-effectiveness                  | Markov model                                                                      | Type 2 diabetes                                            | Estimate the incremental cost-effectiveness of intensive glycemic control (relative to conventional control), intensified hypertension                                                                                                                                                       |

|                                                                                                                                                                                                                                                                                                                                                                                                                                                                                                                         |      |                     |                    |                                                                       |                                     |                                |                       |                                                                                                                                                                                                                           |
|-------------------------------------------------------------------------------------------------------------------------------------------------------------------------------------------------------------------------------------------------------------------------------------------------------------------------------------------------------------------------------------------------------------------------------------------------------------------------------------------------------------------------|------|---------------------|--------------------|-----------------------------------------------------------------------|-------------------------------------|--------------------------------|-----------------------|---------------------------------------------------------------------------------------------------------------------------------------------------------------------------------------------------------------------------|
| Group <sup>42</sup>                                                                                                                                                                                                                                                                                                                                                                                                                                                                                                     |      |                     |                    |                                                                       |                                     |                                |                       | control, and reduction in serum cholesterol level for patients with type 2 diabetes                                                                                                                                       |
| DCCT group <sup>43</sup>                                                                                                                                                                                                                                                                                                                                                                                                                                                                                                | 1996 | USA                 | Health care system | Lifetime                                                              | Cost-effectiveness                  | Simulation model               | Type 1 diabetes       | Examine the cost-effectiveness of alternative management of IDDM                                                                                                                                                          |
| Thokala et al. <sup>44</sup>                                                                                                                                                                                                                                                                                                                                                                                                                                                                                            | 2014 | UK                  | Health service     | Lifetime                                                              | Cost-effectiveness                  | Markov Model                   | Type 1 diabetes       | Build a flexible and comprehensive long-term type 1 diabetes mellitus model incorporating the most up-to-date methodologies to allow a number of cost-effectiveness evaluations                                           |
| Van Os et al. <sup>45</sup>                                                                                                                                                                                                                                                                                                                                                                                                                                                                                             | 2000 | Netherlands         | Health care        | Lifetime (50 years for type 1 diabetes, 30-years for type 2 diabetes) | Cost-effectiveness                  | Semi-Markov model              | Type 1 and 2 diabetes | Examine the cost-effectiveness of guideline recommendations for prevention of nephropathy in diabetes mellitus type 1 and 2                                                                                               |
| Willis et al. <sup>46</sup>                                                                                                                                                                                                                                                                                                                                                                                                                                                                                             | 2013 | Sweden, Finland USA | NR                 | NR                                                                    | Validation of model                 | Micro-simulation model         | Type 2 diabetes       | Present results of a formal validation exercise of the ECHO-T2DM model                                                                                                                                                    |
| Wu et al. <sup>47</sup>                                                                                                                                                                                                                                                                                                                                                                                                                                                                                                 | 2017 | China               | Chinese healthcare | Lifetime                                                              | Cost-effectiveness                  | Decision tree and Markov model | Type 2 diabetes       | Assess the cost-effectiveness of preventing diabetic kidney disease in patients with newly diagnosed type 2 diabetes from the Chinese healthcare perspective                                                              |
| Zhou et al. <sup>48</sup>                                                                                                                                                                                                                                                                                                                                                                                                                                                                                               | 2005 | USA                 | Health system      | 10years                                                               | Cost-effectiveness and cost-utility | Semi-Markov model              | Type 2 diabetes       | Develop and validate a comprehensive computer simulation model to assess the impact of screening, prevention, and treatment strategies on type 2 diabetes and its complications, comorbidities, quality of life, and cost |
| <p><i>ACEI: angiotensin converting enzyme inhibitor; ARB: angiotensin receptor blockers; CGM: continuous glucose monitoring; CKD: chronic kidney disease; CVD: cardiovascular disease; DCCT: Diabetes control and complications trial; IDDM: insulin dependent diabetes mellitus; NA: not applicable; NHS: National Health System; NPH: Neutral Protamine Hagedorn; NIDDM: Non-insulin-dependent diabetes mellitus; NR: not reported; SMBG: self-monitoring of blood glucose; QALY: quality-adjusted life year.</i></p> |      |                     |                    |                                                                       |                                     |                                |                       |                                                                                                                                                                                                                           |

**Supplementary Table 15. Summary of unique models: health states, disease progression, CV events and discount rates**

| Study                                          | Health states related to kidney disease                                                                            | Approach used to model CKD progression                                                 | Approach used to model CV events                                                                                                                  | Discounting |
|------------------------------------------------|--------------------------------------------------------------------------------------------------------------------|----------------------------------------------------------------------------------------|---------------------------------------------------------------------------------------------------------------------------------------------------|-------------|
| Adarkwah et al. <sup>1</sup>                   | Normoalbuminuria, microalbuminuria, macroalbuminuria, ESRD (treated with dialysis or renal transplantation), death | Transition rates                                                                       | NA                                                                                                                                                | 3%          |
| Airoidi et al. <sup>2*</sup>                   | Normoalbuminuria, microalbuminuria, microalbuminuria, ESRD                                                         | Transition rates                                                                       | NR                                                                                                                                                | 3.5%        |
| Bagust et al. <sup>3*</sup>                    | No nephropathy, microalbuminuria, gross proteinuria, ESRD                                                          | Transition probabilities                                                               | Framingham risk score                                                                                                                             | NR          |
| Beckwith et al. <sup>4*</sup>                  | ESRD                                                                                                               | NR                                                                                     | Probability of CHD, derived from Nathan (2005)                                                                                                    | 3%          |
| Bertram et al. <sup>5</sup>                    | Diabetes, diabetic renal disease, dead                                                                             | Transition probabilities                                                               | Transition probabilities dependent on age and gender                                                                                              | 3%          |
| Boehringer Ingelheim Ltd (TA336 <sup>6</sup> ) | Renal failure                                                                                                      | Risk equation                                                                          | Risk equation, used UKPDS equations                                                                                                               | 3.5%        |
| Brown et al. <sup>7*</sup>                     | No nephropathy, microalbuminuria, gross proteinuria, ESRD                                                          | Incidence rates                                                                        | Probability of MI< stroke, CHF, derived from Framingham risk score                                                                                | NR          |
| Campbell et al. <sup>8</sup>                   | Rosen (2005)                                                                                                       | Transition probabilities                                                               | Probability of CVD event, derived from Parving (2001), USRDS, Yuyun (2004)                                                                        | 3%          |
| Caro et al. <sup>9</sup>                       | Adapted Eastman model (1997)                                                                                       | NR                                                                                     | NR                                                                                                                                                | 3%          |
| Chen et al. <sup>10</sup>                      | No nephropathy, microalbuminuria, proteinuria, ESRD                                                                | Transition parameters                                                                  | Incidence of CV, derived from Framingham risk score                                                                                               | 3%          |
| Chen et al. <sup>11</sup>                      | Diabetes-related events: renal failure                                                                             | Risk equations                                                                         | NR                                                                                                                                                | NR          |
| Clark et al. <sup>12</sup>                     | Diabetes with macroproteinuria, ESRD treatment, short dialysis short transplant, death                             | Rate of decline for creatinine clearance                                               | NR                                                                                                                                                | 5%          |
| Clarke et al. <sup>13</sup>                    | NR in detail; seven diabetes-related complications (includes renal)                                                | Equation 7 using a combination of Gompertz and logistic regression equations (Table 2) | Used Weibull equations                                                                                                                            | NR          |
| Dall et al. <sup>14</sup>                      | Renal failure                                                                                                      | Transition probabilities<br>Renal failure: Age and sex specific incidence rates        | Probability of MI, stroke, IHD, LVH, CHF, derived from UKPDS Outcomes model, Framingham heart study and Framingham offspring study amongst others | 3%          |
| Dong et al. <sup>15</sup>                      | Normoalbuminuria, microalbuminuria, macroalbuminuria, ESRD                                                         | Transition probabilities                                                               | Risk of CAD, derived from Krolewski (1987)                                                                                                        | 3%          |
| Eastman et al. <sup>16*</sup>                  | No nephropathy, Microalbuminuria, proteinuria, ESRD                                                                | Hazard rate (per year)                                                                 | Probability of CVD, derived from USRDS                                                                                                            | 3%          |

|                                |                                                                                                                                                                                                                                                                                          |                                                                |                                                                                                      |                              |
|--------------------------------|------------------------------------------------------------------------------------------------------------------------------------------------------------------------------------------------------------------------------------------------------------------------------------------|----------------------------------------------------------------|------------------------------------------------------------------------------------------------------|------------------------------|
| Eddy et al. <sup>17</sup>      | Nephropathy submodel                                                                                                                                                                                                                                                                     | Equations                                                      | NR                                                                                                   | NR                           |
| Garattini et al. <sup>18</sup> | No ESRD, ESRD, death                                                                                                                                                                                                                                                                     | Event probabilities                                            | NR                                                                                                   | 5%                           |
| Golan et al. <sup>19</sup>     | Normoalbuminuria, microalbuminuria, gross proteinuria, ESRD                                                                                                                                                                                                                              | Transition rates                                               | NR                                                                                                   | 3%                           |
| Grima et al. <sup>20</sup>     | ESRD is a complication in the model                                                                                                                                                                                                                                                      | Complication rates                                             | Probability of MI, stroke and HF, derived from UKPDS                                                 | 5%                           |
| Hayashino et al. <sup>21</sup> | CKD, ESRD, death                                                                                                                                                                                                                                                                         | CCr yearly decline rate and yearly rate of progression to ESRD | NR                                                                                                   | 3%                           |
| Hayes et al. <sup>22*</sup>    | Event history: renal                                                                                                                                                                                                                                                                     | Risk equations (renal failure: equation 13)                    | Annual event rate for MI, stroke and CHF, calculated from total number of events/total patient-years | NA                           |
| Hoerger et al. <sup>23*</sup>  | Normal, low/high microalbuminuria, clinical nephropathy, ESRD, ESRD death                                                                                                                                                                                                                | Transition probabilities                                       | Probability of stroke to death                                                                       | 3%                           |
| Kiberd et al. <sup>24</sup>    | Strategy A: IDDM, hypertension, microalbuminuria, macroalbuminuria, ESRD<br>Strategy B: IDDM, microalbuminuria, macroalbuminuria, ESRD                                                                                                                                                   | Transition probabilities                                       | Probability of hypertension                                                                          | 5%                           |
| McEwan et al. <sup>25</sup>    | No nephropathy, micro-albuminuria, macro-albuminuria with or without impaired GFR and ESRD. Upon progression to ESRD patients can receive transplant, experience graft failure and return to dialysis or die either whilst receiving dialysis or from the functioning graft health state | Transition probabilities                                       | Probability of MI, derived from Swedish National Diabetes registry                                   | 3.5%                         |
| McEwan et al. <sup>26</sup>    | No nephropathy, microalbuminuria, gross proteinuria, ESRD                                                                                                                                                                                                                                | Eastman model (1997)                                           | Probability of CHD, derived from UKPDS                                                               | Costs: 6% and benefits: 1.5% |
| McEwan et al. <sup>27*</sup>   | Nephropathy                                                                                                                                                                                                                                                                              | Transition probabilities                                       | Derived probabilities from Framingham risk score                                                     | 3.5%                         |
| McQueen et al. <sup>28*</sup>  | Nephropathy, nephropathy and CHD, neuropathy and nephropathy, ESRD                                                                                                                                                                                                                       | Transition probabilities                                       | NR                                                                                                   | 3%                           |
| Mueller et al. <sup>29*</sup>  | Microalbuminuria, macro-albuminuria, ESRD                                                                                                                                                                                                                                                | Risk equations                                                 | Probabilities of MI, stroke, angina and HF calculated for non-fatal and fatal events                 | NR                           |
| Nagy et al. <sup>30</sup>      | No nephropathy, undetected microalbuminuria, detected microalbuminuria, undetected gross proteinuria, detected gross proteinuria, dialysis, with renal transplant and death                                                                                                              | Transition probabilities                                       | Transition probabilities                                                                             | 3.78%                        |
| Palmer et al. <sup>31*</sup>   | No renal disease, microalbuminuria, macro-albuminuria, ESRD, kidney transplantation, haemodialysis, peritoneal dialysis, graft failure, ESRD-specific mortality, non-specific mortality                                                                                                  | Transition probabilities                                       | NR                                                                                                   | 3%                           |
| Palmer et al. <sup>32*</sup>   | No renal complications, microalbuminuria, gross proteinuria, ESRD (either haemodialysis, peritoneal dialysis or kidney transplant) and death following ESRD                                                                                                                              | Transition probabilities                                       | NR                                                                                                   | NR                           |

|                                                     |                                                                                                                                                                                                                                                                                                                                                                                                                                                                                                                                                                                                                     |                          |                                                                                |                              |
|-----------------------------------------------------|---------------------------------------------------------------------------------------------------------------------------------------------------------------------------------------------------------------------------------------------------------------------------------------------------------------------------------------------------------------------------------------------------------------------------------------------------------------------------------------------------------------------------------------------------------------------------------------------------------------------|--------------------------|--------------------------------------------------------------------------------|------------------------------|
| Palmer et al. <sup>33</sup>                         | Microalbuminuria, early overt nephropathy, advanced overt nephropathy, DSC, ESRD treated with dialysis, ESRD treated with renal transplant, and death                                                                                                                                                                                                                                                                                                                                                                                                                                                               | Transition probabilities | NR                                                                             | 3%                           |
| Palmer et al. <sup>34</sup>                         | Not screened: no nephropathy, microalbuminuria, early overt nephropathy, advanced overt nephropathy, doubling serum creatinine, dialysis, kidney transplant, death.<br>Screened: no nephropathy irbesartan treated, microalbuminuria irbesartan treated, early overt nephropathy irbesartan treated, advanced overt nephropathy irbesartan treated, doubling serum creatinine irbesartan treated, dialysis, kidney transplant, death<br>No nephropathy not irbesartan treated, microalbuminuria, early overt nephropathy, advanced overt nephropathy, doubling serum creatinine, dialysis, kidney transplant, death | Transition probabilities | NR                                                                             | 3%                           |
| Rodby et al. <sup>35</sup>                          | Survive, doubling of serum creatinine, ESRD + dialysis, ESRD + transplant, death                                                                                                                                                                                                                                                                                                                                                                                                                                                                                                                                    | Transition probabilities | Modelled as transitions and were temporary                                     | 3%                           |
| Rodby et al. <sup>36</sup>                          | Diabetic nephropathy, routine care, complication comorbidity ESRD, death, dialysis, transplant                                                                                                                                                                                                                                                                                                                                                                                                                                                                                                                      | Transition rates         | Relative risk of CV events                                                     | 5%                           |
| Sakthong et al. <sup>37</sup>                       | Microalbuminuria, macroalbuminuria, ESRD, death                                                                                                                                                                                                                                                                                                                                                                                                                                                                                                                                                                     | Transition rates         | NR                                                                             | 8%                           |
| Shearer et al. <sup>38</sup>                        | Normoalbuminuria, microalbuminuria, overt diabetic nephropathy, ESRD, death                                                                                                                                                                                                                                                                                                                                                                                                                                                                                                                                         | HbA1C levels             | NR                                                                             | Costs: 6% and benefits: 1.5% |
| Smith et al. <sup>39*</sup>                         | Normal albumin levels, microalbuminuria, nephropathy, ESRD, death                                                                                                                                                                                                                                                                                                                                                                                                                                                                                                                                                   | Transition rates         | Probability of CV derived from MARVAL study                                    | 3%                           |
| Srisubat et al. <sup>40</sup>                       | Normalbuminuria, microalbuminuria, macroalbuminuria elevated serum creatine, ESRD, death                                                                                                                                                                                                                                                                                                                                                                                                                                                                                                                            | Transition rates         | NR                                                                             | 3%                           |
| Steen Carlsson et al. <sup>41</sup>                 | None, microalbuminuria, macroalbuminuria, ESRD                                                                                                                                                                                                                                                                                                                                                                                                                                                                                                                                                                      | Risk equations           | Calculated from the characteristics of the cohort and risk equations           | 3%                           |
| CDC Diabetes Cost-effectiveness Group <sup>42</sup> | Normal, low micro/high micro, clinical nephropathy, ESRD, death                                                                                                                                                                                                                                                                                                                                                                                                                                                                                                                                                     | Transition probabilities | NR                                                                             | 3%                           |
| DCCT group <sup>43</sup>                            | Normoalbuminuria, microalbuminuria, albuminuria, ESRD                                                                                                                                                                                                                                                                                                                                                                                                                                                                                                                                                               | Annual probabilities     | NR                                                                             | 3%                           |
| Thokala et al. <sup>44</sup>                        | No nephropathy, microalbuminuria, macroalbuminuria, ESRD, death                                                                                                                                                                                                                                                                                                                                                                                                                                                                                                                                                     | Transition rates         | Probability of MI, stroke, angina and revascularisation derived from DCCT/EDIC | 3.5%                         |
| Van Os et al. <sup>45</sup>                         | Diabetes type 1 or 2, microalbuminuria, macroalbuminuria, ESRD, death                                                                                                                                                                                                                                                                                                                                                                                                                                                                                                                                               | Transition rates         | NR                                                                             | 3%                           |
| Willis et al. <sup>46*</sup>                        | No nephropathy, microalbuminuria, gross proteinuria, ESRD                                                                                                                                                                                                                                                                                                                                                                                                                                                                                                                                                           | NR                       | NR                                                                             | NR                           |
| Wu et al. <sup>47*</sup>                            | Markov model module: diabetes normal, microalbuminuria, macroalbuminuria, ESRD, death                                                                                                                                                                                                                                                                                                                                                                                                                                                                                                                               | Transition rates         | NR                                                                             | 3%                           |



|                                                                                                                                                                                                                                                                                                                                                                                                                                                                                                                   |                                                                                                    |                  |    |    |
|-------------------------------------------------------------------------------------------------------------------------------------------------------------------------------------------------------------------------------------------------------------------------------------------------------------------------------------------------------------------------------------------------------------------------------------------------------------------------------------------------------------------|----------------------------------------------------------------------------------------------------|------------------|----|----|
| Zhou et al. <sup>48*</sup>                                                                                                                                                                                                                                                                                                                                                                                                                                                                                        | Normal, microalbuminuria, proteinuria, ESRD with dialysis, ESRD with transplant, death due to ESRD | Transition rates | NR | 0% |
| <p><i>ACEI: angiotensin converting enzyme inhibitor; ARB: angiotensin receptor blockers; CAD: coronary artery disease; CHD: congestive heart disease; CHF: coronary heart failure; CVD: cardiovascular disease; DCCT: Diabetes control and complications trial; GFR: glomerular filtration rate; IDDM: insulin dependent diabetes mellitus; IHD: ischaemic heart disease; LVH: Left ventricular hypertrophy; MI: myocardial infarction; NIDDM: Non-insulin-dependent diabetes mellitus; NR: not reported.</i></p> |                                                                                                    |                  |    |    |

**Supplementary Table 16. Summary of unique models: Sensitivity analyses and drivers of cost-effectiveness**

| Study                                          | Sensitivity analyses               | Drivers of cost-effectiveness                                                                                                                                                                           | Validation                                                                                                                                                                                                                                                                                                                           |
|------------------------------------------------|------------------------------------|---------------------------------------------------------------------------------------------------------------------------------------------------------------------------------------------------------|--------------------------------------------------------------------------------------------------------------------------------------------------------------------------------------------------------------------------------------------------------------------------------------------------------------------------------------|
| Adarkwah et al. <sup>1</sup>                   | One-way                            | Discount rate, the absolute risk for progression from micro- to macro-albuminuria without ACE inhibition as well as the relative risk for progression from normo- to microalbuminuria with ACEI therapy | NR                                                                                                                                                                                                                                                                                                                                   |
| Airoldi et al. <sup>2</sup>                    | Conducted, details NR              | NR                                                                                                                                                                                                      | Compared the prevalence of complications resulting from the initial condition with data from the literature                                                                                                                                                                                                                          |
| Bagust et al. <sup>3</sup>                     | Conducted, details NR              | Monetary value of health benefits                                                                                                                                                                       | NR                                                                                                                                                                                                                                                                                                                                   |
| Beckwith et al. <sup>4</sup>                   | Conducted, details NR              | NR                                                                                                                                                                                                      | NR                                                                                                                                                                                                                                                                                                                                   |
| Bertram et al. <sup>5</sup>                    | Conducted, details NR              | NR                                                                                                                                                                                                      | NR                                                                                                                                                                                                                                                                                                                                   |
| Boehringer Ingelheim Ltd (TA336 <sup>6</sup> ) | Probabilistic sensitivity analysis | Results are robust to a number of sensitivity analysis and that the key drivers are the clinical effectiveness and adverse events rather than any of the assumptions                                    | Expert meetings with a UK clinical diabetologists were conducted by Boehringer Ingelheim. IMS model used to validate the analysis by conducting a series of cost effectiveness analyses using where possible the same input parameters. Internal verification of the model was conducted throughout the model implementation process |
| Brown et al. <sup>7</sup>                      | NR                                 | NR                                                                                                                                                                                                      | NR                                                                                                                                                                                                                                                                                                                                   |
| Campbell et al. <sup>8</sup>                   | One-way and two-way                | Drug costs                                                                                                                                                                                              | NR                                                                                                                                                                                                                                                                                                                                   |
| Caro et al. <sup>9</sup>                       | Conducted, details NR              | NR                                                                                                                                                                                                      | NR                                                                                                                                                                                                                                                                                                                                   |
| Chen et al. <sup>10</sup>                      | NR                                 | NR                                                                                                                                                                                                      | NR                                                                                                                                                                                                                                                                                                                                   |
| Chen et al. <sup>11</sup>                      | NR                                 | NR                                                                                                                                                                                                      | NR                                                                                                                                                                                                                                                                                                                                   |

|                                |                           |                                                                                                                                                                                                                 |                                                                                                                                                                                                                                                                                                                                                                                                                                     |
|--------------------------------|---------------------------|-----------------------------------------------------------------------------------------------------------------------------------------------------------------------------------------------------------------|-------------------------------------------------------------------------------------------------------------------------------------------------------------------------------------------------------------------------------------------------------------------------------------------------------------------------------------------------------------------------------------------------------------------------------------|
| Clark et al. <sup>12</sup>     | One-way and two-way       | Compliance, effect of benefit and the cost of drug therapy                                                                                                                                                      | Evidence for construct validity was based on correlation with the Spitzer Quality of Life Index and a provider visual analogue scale                                                                                                                                                                                                                                                                                                |
| Clarke et al. <sup>13</sup>    | NR                        | NR                                                                                                                                                                                                              | Tested the consistency of the forecast cumulative incidence of different complications and death to the cumulative incidence calculated using non-parametric (life-table) methods                                                                                                                                                                                                                                                   |
| Dall et al. <sup>14</sup>      | One-way and deterministic | Predicting annual changes in HbA1c as a person ages and as other risk factors change                                                                                                                            | Followed guidelines published by the International Society for Pharmacoeconomics and Outcomes Research and Society for Medical Decision Making                                                                                                                                                                                                                                                                                      |
| Dong et al. <sup>15</sup>      | Conducted, details NR     | How effective ACEIs are in delaying the onset of microalbuminuria                                                                                                                                               | NR                                                                                                                                                                                                                                                                                                                                                                                                                                  |
| Eastman et al. <sup>16</sup>   | NR                        | Age at onset of clinical diabetes, ethnicity of the cohort                                                                                                                                                      | NR                                                                                                                                                                                                                                                                                                                                                                                                                                  |
| Eddy et al. <sup>17</sup>      | NR                        | NR                                                                                                                                                                                                              | Validated against clinical trials                                                                                                                                                                                                                                                                                                                                                                                                   |
| Garattini et al. <sup>18</sup> | Conducted, details NR     | NR                                                                                                                                                                                                              | NR                                                                                                                                                                                                                                                                                                                                                                                                                                  |
| Golan et al. <sup>19</sup>     | Conducted, details NR     | Age at diagnosis of diabetes, cost of ACEIs, relative risk for progression to microalbuminuria, and quality-of-life adjustment for ACEIs                                                                        | NR                                                                                                                                                                                                                                                                                                                                                                                                                                  |
| Grima et al. <sup>20</sup>     | One-way                   | Baseline HbA1c, the efficacy of insulin gargine and diabetes costs                                                                                                                                              | Model was validated in terms of its ability to accurately estimate the 5- year incidence of diabetes-related complications reported in the HOPE study                                                                                                                                                                                                                                                                               |
| Hayashino et al. <sup>21</sup> | One-way                   | Effectiveness of AST-120                                                                                                                                                                                        | NR                                                                                                                                                                                                                                                                                                                                                                                                                                  |
| Hayes et al. <sup>22</sup>     | One-way and deterministic | Classic risk factors (SBP, HbA1c and lipids) in predicting life expectancy importance of many of the novel risk factors, in particular eGFR, micro- or macro-albuminuria, heart rate and white blood cell count | Internal validation of the simulation model by testing its performance in replicating the incidence of complications and mortality over 25 years of follow-up. Compared simulated cumulative failure of each of the major outcomes of the model with the observed (Kaplan–Meier) cumulative failure of events under the assumption adopted in many clinical studies that death as well as date of last contact are censoring events |
| Hoerger et al. <sup>23</sup>   | One-way and probabilistic | Effects of intensive hypertension control                                                                                                                                                                       | NR                                                                                                                                                                                                                                                                                                                                                                                                                                  |
| Kiberd et al. <sup>24</sup>    | Conducted                 | NR                                                                                                                                                                                                              | NR                                                                                                                                                                                                                                                                                                                                                                                                                                  |
| McEwan et al. <sup>25</sup>    | NR                        | NR                                                                                                                                                                                                              | Regression analysis indicated that endpoint predictions and costs had non- significant intercept terms (p = 0.009 and p = 0.652 respectively) indicating no systematic over or under-prediction                                                                                                                                                                                                                                     |
| McEwan et al. <sup>26</sup>    | One-way                   | NR                                                                                                                                                                                                              | Face validation of the model was conducted to ensure correct logical functioning. The output was validated by comparing how well the model reconstructed data from the UKPDS, Eastman and Cardiff model                                                                                                                                                                                                                             |
| McEwan et al. <sup>27</sup>    | Extensive one-way         | Price of glargine, the utility decrement associated with hypoglycaemia, and the cohorts' mean weight. The ICER was also sensitive to the                                                                        | Model epidemiological outputs were tested versus published data                                                                                                                                                                                                                                                                                                                                                                     |

|                                                      |                                        |                                                                                                                                                                                                                                                                            |                                                                                                                                                                                                                                                 |
|------------------------------------------------------|----------------------------------------|----------------------------------------------------------------------------------------------------------------------------------------------------------------------------------------------------------------------------------------------------------------------------|-------------------------------------------------------------------------------------------------------------------------------------------------------------------------------------------------------------------------------------------------|
|                                                      |                                        | duration of HbA1c treatment effect with the baseline ICER of £3189 for scenario 5 increasing to £7485, £14 755 and £47 445 with 10-, 5- and 2-year treatment effects duration, respectively                                                                                |                                                                                                                                                                                                                                                 |
| McQueen et al. <sup>28</sup>                         | One-way and multivariate probabilistic | Utility of diabetes with no complications, the annual cost of CHD, and the probability of going from diabetes with no complications to the CHD disease state                                                                                                               | NR                                                                                                                                                                                                                                              |
| Mueller et al. <sup>29</sup>                         | Probabilistic                          | NR                                                                                                                                                                                                                                                                         | Both the epidemiological and health economic modules of the EAGLE model were tested and debugged internal validation of EAGLE was performed                                                                                                     |
| Nagy et al. <sup>30</sup>                            | NR                                     | NR                                                                                                                                                                                                                                                                         | NR                                                                                                                                                                                                                                              |
| Palmer et al. <sup>31</sup>                          | One-way                                | Cost of renal failure, intensive therapy                                                                                                                                                                                                                                   | NR                                                                                                                                                                                                                                              |
| Palmer et al. <sup>32</sup>                          | Conducted, details NR                  | NR                                                                                                                                                                                                                                                                         | Addressed in a separate publication (Palmer, 2004), which describes a total of 66 second-(internal) and third- (external) order validation analyses performed across a range of complications and outcomes simulated by the CORE Diabetes Model |
| Palmer et al. <sup>33</sup>                          | Second-order Monte Carlo simulation    | NR                                                                                                                                                                                                                                                                         | NR                                                                                                                                                                                                                                              |
| Palmer et al. <sup>34</sup>                          | Conducted, details NR                  | Patient age                                                                                                                                                                                                                                                                | NR                                                                                                                                                                                                                                              |
| Rodby et al. <sup>35</sup>                           | One-way                                | Transition probabilities from the survive, to death states and from ESRD dialysis to death for the irbesartan strategy                                                                                                                                                     | NR                                                                                                                                                                                                                                              |
| Rodby et al. <sup>36</sup>                           | Conducted, details NR                  | NR                                                                                                                                                                                                                                                                         | NR                                                                                                                                                                                                                                              |
| Sakthong et al. <sup>37</sup>                        | Conducted, details NR                  | Cost of the drug, cost of ESRD treatment, effectiveness of the drug                                                                                                                                                                                                        | NR                                                                                                                                                                                                                                              |
| Shearer et al. <sup>38</sup>                         | One-way and multivariate               | Discount percentage, first year HbA1c reduction, mortality rates, progression of neuropathy and nephropathy, cost of foot ulcers and dialysis, utility, structured treatment and teaching programme course cost, benefit from ketoacidosis                                 | NR                                                                                                                                                                                                                                              |
| Smith et al. <sup>39</sup>                           | NR                                     | Costs and utility weights assigned to health states                                                                                                                                                                                                                        | NR                                                                                                                                                                                                                                              |
| Srisubat et al. <sup>40</sup>                        | One-way and probabilistic              | Positive predictive value of urine dipsticks, cost of urine dipsticks, discount rate, transition probability of microalbuminuria to macroalbuminuria, cost of dialysis, relative risk of ACEI for microalbuminuria to macro-albuminuria, increased travel cost and utility | NR                                                                                                                                                                                                                                              |
| Steen Carlsson et al. <sup>41</sup>                  | Second order probabilistic             | Number of hypoglycemic events when on insulin treatment, initiation of second line treatment at different HbA1c levels, BMI                                                                                                                                                | The IHE Cohort Model of type 2 diabetes has been validated against published trial data and large population cohort data                                                                                                                        |
| CDC Diabetes Cost- effectiveness Group <sup>42</sup> | One-way                                | Case management costs, assumption that patients with hypertension progressed faster to nephropathy and retinopathy                                                                                                                                                         | NR                                                                                                                                                                                                                                              |
| DCCT group <sup>43</sup>                             | Conducted, details NR                  | Changes in the incidence of microalbuminuria, the cost of therapy, and the discount rate                                                                                                                                                                                   | NR                                                                                                                                                                                                                                              |
| Thokala et al. <sup>44</sup>                         | Probabilistic                          | NR                                                                                                                                                                                                                                                                         | Internal validation of the model code (visual logic in Simul8) was                                                                                                                                                                              |

|                                                                                                                                                                                                                                                                                                                                                                                                       |                                    |                                                                                                  |                                                                                                                                                                                                                                                                                                                                                                                                                                                                                                                                                                           |
|-------------------------------------------------------------------------------------------------------------------------------------------------------------------------------------------------------------------------------------------------------------------------------------------------------------------------------------------------------------------------------------------------------|------------------------------------|--------------------------------------------------------------------------------------------------|---------------------------------------------------------------------------------------------------------------------------------------------------------------------------------------------------------------------------------------------------------------------------------------------------------------------------------------------------------------------------------------------------------------------------------------------------------------------------------------------------------------------------------------------------------------------------|
|                                                                                                                                                                                                                                                                                                                                                                                                       |                                    |                                                                                                  | conducted throughout model implementation. Patient characteristics and complication statuses were checked to ensure that they were changing as expected, and that patients were following expected routes. The costs and utility value outputs each year were checked against the patient status outputs for face validity. The aggregated outputs were also cross-checked against the sum of individual patient outputs. Internal validation was also conducted, whereby the risk model for each complication was validated against the data from which it was estimated |
| Van Os et al. <sup>45</sup>                                                                                                                                                                                                                                                                                                                                                                           | NR                                 | Health care costs of renal replacement therapy in elderly diabetes patients                      | Validation of the model was done using diabetes and dialysis prevalence data from national statistics                                                                                                                                                                                                                                                                                                                                                                                                                                                                     |
| Willis et al. <sup>46</sup>                                                                                                                                                                                                                                                                                                                                                                           | NR                                 | NR                                                                                               | Followed the ISPOR-SMDM principles of good practice                                                                                                                                                                                                                                                                                                                                                                                                                                                                                                                       |
| Wu et al. <sup>47</sup>                                                                                                                                                                                                                                                                                                                                                                               | Second-order Monte Carlo technique | Probability for developing macro albuminuria, diabetes diagnosis, daily cost of ACEI/ARB therapy | NR                                                                                                                                                                                                                                                                                                                                                                                                                                                                                                                                                                        |
| Zhou et al. <sup>48</sup>                                                                                                                                                                                                                                                                                                                                                                             | NR                                 | NR                                                                                               | Model validated on the basis of its ability to predict outcomes when tested under hypothetical conditions in which the results should be obvious and by its ability to predict outcomes as defined by a long term epidemiologic study                                                                                                                                                                                                                                                                                                                                     |
| <p><i>ACEI: angiotensin converting enzyme inhibitor; ARB: angiotensin receptor blockers; BMI: body mass index; CHD: coronary heart disease; eGFR: estimated glomerular filtration rate; ESRD: end-stage renal disease; ICER: incremental cost- effectiveness ratio; ISPOR: international society for pharmacoeconomics and outcomes research; NR: not reported; SBP: systolic blood pressure.</i></p> |                                    |                                                                                                  |                                                                                                                                                                                                                                                                                                                                                                                                                                                                                                                                                                           |

## References

1. Adarkwah CC, Gandjour A, Akkerman M, Evers SM. Cost-effectiveness of Angiotensin-converting enzyme inhibitors for the prevention of diabetic nephropathy in The Netherlands - A Markov model. *PLoS ONE*. 2011;6(10).
2. Airoidi M, Bevan G, Morton A, Oliveira M, Smith J. Requisite models for strategic commissioning: the example of type 1 diabetes. *Health care management science*. 2008;11(2):89-110.
3. Bagust A, Hopkinson P, Maier W, Currie C. An economic model of the long-term health care burden of Type II diabetes. *Diabetologia*. 2001;44(12):2140-55.
4. Beckwith J, Nyman JA, Flanagan B, Schrover R, Schuurman HJ. A health economic analysis of clinical islet transplantation. *Clinical transplantation*. 2012;26(1):23-33.
5. Bertram MY, Lim SS, Barendregt JJ, Vos T. Assessing the cost-effectiveness of drug and lifestyle intervention following opportunistic screening for pre-diabetes in primary care. *Diabetologia*. 2010;53(5):875-81.
6. National Institute for Health and Care Excellence. Technology appraisal guidance [TA336]: Empagliflozin in combination therapy for treating type 2 diabetes. Available at: <https://www.nice.org.uk/guidance/ta336> [Accessed 20 December 2017].
7. Brown JB, Russell A, Chan W, Pedula K, Aickin M. The global diabetes model: user friendly version 3.0. *Diabetes research and clinical practice*. 2000;50:S15-S46.
8. Campbell HM, Boardman KD, Dodd MA, Raisch DW. Pharmacoeconomic analysis of angiotensin-converting enzyme inhibitors in type 2 diabetes: A Markov model. *Annals of Pharmacotherapy*. 2007;41(7-8):1101-10.
9. Caro JJ, Klittich WS, Raggio G, Kavanagh PL, O'Brien JA, Shomphe LA, et al. Economic assessment of troglitazone as an adjunct to sulfonylurea therapy in the treatment of type 2 diabetes. *Clinical therapeutics*. 2000;22(1):116-27.
10. Chen TH, Yen MF, Tung TH. A computer simulation model for cost-effectiveness analysis of mass screening for type 2 diabetes mellitus (Structured abstract). *Diabetes Research and Clinical Practice*. 2001;54(Supplement 1):S37-s42.
11. Chen J, Alemao E, Yin D, Cook J. Development of a diabetes treatment simulation model: with application to assessing alternative treatment intensification strategies on survival and diabetes-related complications. *Diabetes, Obesity and Metabolism*. 2008;10(s1):33-42.

12. Clark WF, Churchill DN, Forwell L, Macdonald G, Foster S. To pay or not to pay? A decision and cost-utility analysis of angiotensin-converting-enzyme inhibitor therapy for diabetic nephropathy. *CMAJ : Canadian Medical Association journal = journal de l'Association medicale canadienne*. 2000;162(2):195-8.
13. Clarke PM, Gray AM, Briggs A, Farmer AJ, Fenn P, Stevens RJ, et al. A model to estimate the lifetime health outcomes of patients with Type 2 diabetes: The United Kingdom Prospective Diabetes Study (UKPDS) Outcomes Model (UKPDS no. 68). *Diabetologia*. 2004;47(10):1747-59.
14. Dall TM, Storm MV, Semilla AP, Wintfeld N, O'Grady M, Venkat Narayan KM. Value of lifestyle intervention to prevent diabetes and sequelae. *American Journal of Preventive Medicine*. 2015;48(3):271-80.
15. Dong FB, Sorensen SW, Manninen DL, Thompson TJ, Narayan V, Orians CE, et al. Cost effectiveness of ACE inhibitor treatment for patients with type 1 diabetes mellitus. *Pharmacoeconomics*. 2004;22(15):1015-27.
16. Eastman RC, Javitt JC, Herman WH, Dasbach EJ, Zbrozek AS, Dong F, et al. Model of complications of NIDDM: I. Model construction and assumptions. *Diabetes care*. 1997;20(5):725-34.
17. Eddy DM, Schlessinger L, Kahn R. Clinical outcomes and cost-effectiveness of strategies for managing people at high risk for diabetes. *Annals of Internal Medicine*. 2005;143(4):251-64+I-22.
18. Garattini L, Brunetti M, Salvioni F, Barosi M. Economic evaluation of ACE inhibitor treatment of nephropathy in patients with insulin-dependent diabetes mellitus in Italy. *Pharmacoeconomics*. 1997;12(1):67-75.
19. Golan L, Birkmeyer JD, Welch HG. The cost-effectiveness of treating all patients with type 2 diabetes with angiotensin-converting enzyme inhibitors. *Ann Intern Med*. 1999;131(9):660-7.
20. Grima DT, Thompson MF, Sauriol L. Modelling cost effectiveness of insulin glargine for the treatment of type 1 and 2 diabetes in Canada. 2007;25(3):253-66.
21. Hayashino Y, Fukuhara S, Akizawa T, Asano Y, Wakita T, Onishi Y, et al. Cost-effectiveness of administering oral adsorbent AST-120 to patients with diabetes and advance-stage chronic kidney disease. *Diabetes Res Clin Pract*. 2010;90(2):154-9.
22. Hayes A, Leal J, Gray A, Holman R, Clarke P. UKPDS outcomes model 2: a new version of a model to simulate lifetime health outcomes of patients with type 2 diabetes mellitus using data from the 30 year United Kingdom Prospective Diabetes Study: UKPDS 82. *Diabetologia*. 2013;56(9):1925-33.
23. Hoerger TJ, Harris R, Hicks KA, Donahue K, Sorensen S, Engelgau M. Screening for type 2 diabetes

- mellitus: a cost-effectiveness analysis. *Annals of Internal Medicine*. 2004;140(9):689-99.
24. Kiberd BA, Jindal KK. Screening to prevent renal failure in insulin dependent diabetic patients: an economic evaluation. *BMJ (Clinical research ed)*. 1995;311(7020):1595-9.
  25. McEwan P, Bennett H, Fellows J, Priaux J, Bergenheim K. The health economic value of changes in glycaemic control, weight and rates of hypoglycaemia in type 1 diabetes mellitus. *PLoS ONE*. 2016;11(9).
  26. McEwan P, Peters JR, Bergenheim K, Currie CJ. Evaluation of the costs and outcomes from changes in risk factors in type 2 diabetes using the Cardiff stochastic simulation cost-utility model (DiabForecaster). *Current medical research and opinion*. 2006;22(1):121-9.
  27. McEwan P, Poole CD, Tetlow T, Holmes P, Currie CJ. Evaluation of the cost-effectiveness of insulin glargine versus NPH insulin for the treatment of type 2 diabetes in the UK. *Current Medical Research and Opinion*. 2007;23(sup1):S21-S31.
  28. McQueen R, Ellis S, Campbell J, Nair K, Sullivan P. Cost-effectiveness of continuous glucose monitoring and intensive insulin therapy for type 1 diabetes (Structured abstract). *Cost Effectiveness and Resource Allocation*. 2011;9(13).
  29. Mueller E, Macion-Bergemann S, Gulyaev D, Walzer S, Freemantle N, Mathieu C, et al. Development and validation of the Economic Assessment of Glycemic Control and Long-Term Effects of diabetes (EAGLE) model. *Diabetes technology & therapeutics*. 2006;8(2):219-36.
  30. Nagy B, Zsólyom A, Nagyjánosi L, Merész G, Steiner T, Papp E, et al. Cost-effectiveness of a risk-based secondary screening programme of type 2 diabetes. *Diabetes/Metabolism Research and Reviews*. 2016;32(7):710-29.
  31. Palmer AJ, Weiss C, Sendi PP, Neeser K, Brandt A, Singh G, et al. The cost-effectiveness of different management strategies for type I diabetes: a Swiss perspective. *Diabetologia*. 2000;43(1):13-26.
  32. Palmer AJ, Roze S, Valentine WJ, Minshall ME, Foos V, Lurati FM, et al. The CORE Diabetes Model: Projecting long-term clinical outcomes, costs and cost-effectiveness of interventions in diabetes mellitus (types 1 and 2) to support clinical and reimbursement decision-making. *Curr Med Res Opin*. 2004;20 Suppl 1:S5-26.
  33. Palmer AJ, Annemans L, Roze S, Lamotte M, Lapuerta P, Chen R, et al. Cost-effectiveness of early irbesartan treatment versus control (standard antihypertensive medications excluding ACE inhibitors, other angiotensin-2 receptor antagonists, and dihydropyridine calcium channel blockers) or late irbesartan treatment in patients with type 2 diabetes, hypertension, and renal disease. *Diabetes*



- Care. 2004;27(8):1897-903.
34. Palmer A, Chen R, Valentine W, Roze S, Bregman B, Mehin N, et al. Cost-consequence analysis in a French setting of screening and optimal treatment of nephropathy in hypertensive patients with type 2 diabetes. *Diabetes & metabolism*. 2006;32(1):69-76.
  35. Rodby RA, Chiou CF, Borenstein J, Smitten A, Sengupta N, Palmer AJ, et al. The cost-effectiveness of irbesartan in the treatment of hypertensive patients with type 2 diabetic nephropathy. *Clinical therapeutics*. 2003;25(7):2102-19.
  36. Rodby RA, Firth LM, Lewis EJ. An economic analysis of captopril in the treatment of diabetic nephropathy (Structured abstract). *Diabetes Care*. 1996;19(10):1051-61.
  37. Sakthong P, Tangphao O, Eiam-Ong S, Kamolratanakul P, Supakankunti S, Himathongkam T, et al. Cost-effectiveness of using angiotensin-converting enzyme inhibitors to slow nephropathy in normotensive patients with diabetes type II and microalbuminuria. *Nephrology*. 2001;6(2):71-7.
  38. Shearer A, Bagust A, Sanderson D, Heller S, Roberts S. Cost-effectiveness of flexible intensive insulin management to enable dietary freedom in people with Type 1 diabetes in the UK. *Diabetic Medicine*. 2004;21(5):460-7.
  39. Smith DG, Nguyen AB, Peak CN, Frech FH. Markov modeling analysis of health and economic outcomes of therapy with valsartan versus amlodipine in patients with type 2 diabetes and microalbuminuria. *Journal of managed care pharmacy : JMCP*. 2004;10(1):26-32.
  40. Srisubat A, Sriratanaban J, Ngamkiatphaisan S, Tungsanga K. Cost-effectiveness of annual microalbuminuria screening in Thai diabetics. *Asian Biomedicine*. 2014;8(3):371-9.
  41. Steen Carlsson K, Persson U. Cost-effectiveness of add-on treatments to metformin in a Swedish setting: liraglutide vs sulphonylurea or sitagliptin. *Journal of medical economics*. 2014;17(9):658-69.
  42. Cost-effectiveness of intensive glycemic control, intensified hypertension control, and serum cholesterol level reduction for type 2 diabetes. *Jama*. 2002;287(19):2542-51.
  43. DCCT B. Lifetime benefits and costs of intensive therapy as practiced in the Diabetes Control and Complications Trial. *Jama*. 1996;276:1409-15.
  44. Thokala P, Kruger J, Brennan A, Basarir H, Duenas A, Pandor A, et al. Assessing the cost-effectiveness of type 1 diabetes interventions: the Sheffield type 1 diabetes policy model. *Diabetic medicine : a journal of the British Diabetic Association*. 2014;31(4):477-86.
  45. van Os N, Niessen LW, Bilo HJ, Casparie AF, van Hout BA. Diabetes nephropathy in the Netherlands: a cost effectiveness analysis of national clinical guidelines. *Health policy (Amsterdam, Netherlands)*.

2000;51(3):135-47.

46. Willis M, Asseburg C, He J. Validation of economic and health outcomes simulation model of type 2 diabetes mellitus (ECHO-T2DM). *Journal of medical economics*. 2013;16(8):1007-21.
47. Wu B, Zhang S, Lin H, Mou S. Prevention of renal failure in Chinese patients with newly diagnosed type 2 diabetes: A cost-effectiveness analysis. *Journal of diabetes investigation*. 2017.
48. Zhou H, Isaman DJ, Messinger S, Brown MB, Klein R, Brandle M, et al. A computer simulation model of diabetes progression, quality of life, and cost. *Diabetes care*. 2005;28(12):2856-63.
