# Supplementary material for: Economic Modelling of Chronic Kidney Disease: A Systematic Literature Review to Inform Conceptual Model Design
Source: Springer Nature journal article supplement (doi:10.1007/s40273-019-00835-z), 2019-09-30
Supplement: MOESM7 [file 24130926]

**ECONOMIC MODELLING OF CHRONIC KIDNEY DISEASE: A SYSTEMATIC LITERATURE  
REVIEW TO INFORM CONCEPTUAL MODEL DESIGN**

Daniel M Sugrue<sup>1</sup>, Thomas Ward<sup>1</sup>, Sukhvir Rai<sup>1</sup>, Phil McEwan<sup>1</sup>, Heleen GM van Haalen<sup>2</sup>

<sup>1</sup>Health Economics and Outcomes Research Limited, Cardiff, UK

<sup>2</sup>Global Health Economics, AstraZeneca, Gothenburg, Sweden

**Corresponding author**

Daniel M Sugrue

Health Economics and Outcomes Research Ltd

Rhymney House, Unit A Copse Walk, Cardiff Gate Business Park, Cardiff CF23 8RB

Email: [daniel.sugrue@heor.co.uk](mailto:daniel.sugrue@heor.co.uk)

Tel: +44 (0) 2920 399 146

## Online Resource 7

**Supplementary Table 17. Summary of unique models: Model setting**

| Study                         | Year | Country          | Perspective                | Time horizon     | Type of analysis   | Model type   | Disease setting                           | Research question                                                                                                                                                                                                                                                                                                                 |
|-------------------------------|------|------------------|----------------------------|------------------|--------------------|--------------|-------------------------------------------|-----------------------------------------------------------------------------------------------------------------------------------------------------------------------------------------------------------------------------------------------------------------------------------------------------------------------------------|
| Axelrod et al. <sup>1</sup>   | 2003 | USA              | Third party payer          | NR               | Decision           | Markov model | Renal artery stenosis                     | Determine the incremental cost-effectiveness of prophylactic percutaneous transluminal angioplasty with stent placement (PTA-S) in patients with incidentally discovered, asymptomatic renal artery stenosis compared to delaying PTA-S until patients develop refractory hypertension or renal insufficiency (therapeutic PTA-S) |
| Dorenkamp et al. <sup>2</sup> | 2013 | Germany          | Payer                      | Lifetime         | Cost-effectiveness | Markov model | Resistant hypertension                    | Determine the cost-effectiveness of catheter-based renal sympathetic denervation for the treatment of resistant hypertension separately for men and women of different ages                                                                                                                                                       |
| Gandjour et al. <sup>3</sup>  | 2007 | Germany          | Statutory health insurance | 35, 45, 55 years | Cost-utility       | Markov model | Hypertension                              | Estimate the cost-effectiveness of a national hypertension treatment program compared to no program                                                                                                                                                                                                                               |
| Geisler et al. <sup>4</sup>   | 2012 | UK and Australia | Societal                   | Lifetime         | Cost-effectiveness | Markov model | Resistant hypertension                    | Assess cost-effectiveness and long-term clinical benefits of renal denervation in resistant hypertensive patients                                                                                                                                                                                                                 |
| Marra et al. <sup>5</sup>     | 2017 | Canada           | Third party payer          | 30 years         | Cost-effectiveness | Markov model | CVD and/or ESRD                           | Evaluate the economic impact of observed benefits in trials of pharmacist intervention in blood pressure control, in order to project potential clinical and cost-effectiveness of pharmacist interventions over a longer time horizon                                                                                            |
| Saito et al. <sup>6</sup>     | 2008 | Japan            | Payer                      | 20 years         | Cost-utility       | Markov model | Hypertension                              | Analyse the cost-effectiveness of lifetime antihypertensive therapy with angiotensin II receptor blocker (ARB) monotherapy, calcium channel blocker (CCB) monotherapy, or ARB plus CCB (ARB+CCB) combination therapy                                                                                                              |
| Tajeu et al. <sup>7</sup>     | 2017 | USA              | Third party payer          | Lifetime         | Cost-effectiveness | Markov model | Patients receiving hypertensive treatment | Cost-effectiveness of antihypertensive medication treatment versus no-treatment in white and black adults                                                                                                                                                                                                                         |

*ARB: angiotensin II receptor blockers; CCB: calcium channel blocker; CVD: cardiovascular disease; NR: not reported; PTA-S: percutaneous transluminal angioplasty and stent.*

**Supplementary Table 18. Summary of unique models: health states, disease progression, CV events and discount rates**

| Study                                                                                                                                                           | Health states related to kidney disease                                                  | Approach used to model CKD progression                                             | Approach used to model CV events                                                                                                                        | Discounting |
|-----------------------------------------------------------------------------------------------------------------------------------------------------------------|------------------------------------------------------------------------------------------|------------------------------------------------------------------------------------|---------------------------------------------------------------------------------------------------------------------------------------------------------|-------------|
| Axelrod et al. <sup>1*</sup>                                                                                                                                    | Chronic renal insufficiency, ESRD, and death                                             | Transition probabilities                                                           | Transition probabilities, (details of source not reported)                                                                                              | 3%          |
| Dorenkamp et al. <sup>2</sup>                                                                                                                                   | Transition to ESRD, death                                                                | Transition probabilities                                                           | Transition probabilities during first year after a primary event and relative risks more than 1 year after primary event, derived from large registries | 3%          |
| Gandjour et al. <sup>3*</sup>                                                                                                                                   | Renal failure, death                                                                     | Incidence of renal failure with and without hypertension treatment (age dependent) | Incidence and relative risk of death, derived from MONICA study, meta-analysis study and community study                                                | 3%          |
| Geisler et al. <sup>4*</sup>                                                                                                                                    | ESRD, death                                                                              | ESRD incidence                                                                     | Event probabilities/incidence, derived from Framingham risk equations                                                                                   | 3%          |
| Marra et al. <sup>5*</sup>                                                                                                                                      | Alive no CV or renal history, Alive renal history only, Alive CV and renal history, dead | Relative disease risk                                                              | CVD probabilities, derived from Framingham studies                                                                                                      | 5%          |
| Saito et al. <sup>6*</sup>                                                                                                                                      | Microalbuminuria, apparent proteinuria, ESRD, haemodialysis, non-CV death                | Percentage/year                                                                    | Risk estimation equation, derived from Framingham risk equations                                                                                        | 3%          |
| Tajeu et al. <sup>7*</sup>                                                                                                                                      | CKD, ESRD, death                                                                         | Transition probabilities                                                           | Transition probabilities, derived from Framingham heart study and REGARDS data                                                                          | 3%          |
| <p><i>CV: cardiovascular; CVD: cardiovascular disease; ESRD: end-stage renal disease.</i><br/> <i>*Studies included additional non-renal health states.</i></p> |                                                                                          |                                                                                    |                                                                                                                                                         |             |

**Supplementary Table 19. Summary of unique models: sensitivity analyses and drivers of cost effectiveness**

| Study                                                                                                                                                                                                                                                                                                                                                          | Sensitivity analyses                           | Drivers of cost-effectiveness                                                                                                                                                                                                      | Validation                                                                                                                                                                                                                                                                                    |
|----------------------------------------------------------------------------------------------------------------------------------------------------------------------------------------------------------------------------------------------------------------------------------------------------------------------------------------------------------------|------------------------------------------------|------------------------------------------------------------------------------------------------------------------------------------------------------------------------------------------------------------------------------------|-----------------------------------------------------------------------------------------------------------------------------------------------------------------------------------------------------------------------------------------------------------------------------------------------|
| Axelrod et al. <sup>1</sup>                                                                                                                                                                                                                                                                                                                                    | One-way and two-way                            | Stent cost, the probability of ipsilateral stenosis progression from moderate to high grade, the probability of the contralateral artery progressing from normal to moderate stenosis, and the frequency of restenosis after PTA-S | NR                                                                                                                                                                                                                                                                                            |
| Dorenkamp et al. <sup>2</sup>                                                                                                                                                                                                                                                                                                                                  | Deterministic and probabilistic                | SBP lowering effect related to renal denervation, the rate of renal denervation non-responders, and the costs associated with the renal denervation procedure                                                                      | Validated by comparing model-projected life expectancies with actual German life tables                                                                                                                                                                                                       |
| Gandjour et al. <sup>3</sup>                                                                                                                                                                                                                                                                                                                                   | One-way                                        | Annual discount rate and the relative risk of MI under antihypertensive therapy                                                                                                                                                    | NR                                                                                                                                                                                                                                                                                            |
| Geisler et al. <sup>4</sup>                                                                                                                                                                                                                                                                                                                                    | One-way and probabilistic                      | NR                                                                                                                                                                                                                                 | Assessed the external validity in several ways, including comparing the simulated relative risk of CHD to JNC7- reported relative risks and comparing the predicted MI and stroke incidences for the simulated cohort to the corresponding projections generated by a NICE hypertension model |
| Marra et al. <sup>5</sup>                                                                                                                                                                                                                                                                                                                                      | One-way and probabilistic                      | NR                                                                                                                                                                                                                                 | NR                                                                                                                                                                                                                                                                                            |
| Saito et al. <sup>6</sup>                                                                                                                                                                                                                                                                                                                                      | Conducted, details not provided                | NR                                                                                                                                                                                                                                 | NR                                                                                                                                                                                                                                                                                            |
| Tajeu et al. <sup>7</sup>                                                                                                                                                                                                                                                                                                                                      | One-way, probabilistic and worse-case scenario | Costs of CHD, CKD, and HF                                                                                                                                                                                                          | NR                                                                                                                                                                                                                                                                                            |
| <p><i>CHD: coronary heart disease; HF: heart failure; JNC7: Joint National Committee on Prevention, Detection, Evaluation, and Treatment of High Blood Pressure; MI: myocardial infarction; NICE: National Institute for Health and Care Excellence; NR: not reported; PTA-S: percutaneous transluminal angioplasty and stent; RDN: renal denervation.</i></p> |                                                |                                                                                                                                                                                                                                    |                                                                                                                                                                                                                                                                                               |

## References

1. Axelrod DA, Fendrick AM, Carlos RC, Lederman RJ, Froehlich JB, Weder AB, et al. Percutaneous stenting of incidental unilateral renal artery stenosis: decision analysis of costs and benefits. *Journal of endovascular therapy : an official journal of the International Society of Endovascular Specialists*. 2003;10(3):546-56.
2. Dorenkamp M, Bonaventura K, Leber AW, Boldt J, Sohns C, Boldt LH, et al. Potential lifetime cost-effectiveness of catheter-based renal sympathetic denervation in patients with resistant hypertension. *European heart journal*. 2013;34(6):451-61.
3. Gandjour A, Stock S. A national hypertension treatment program in Germany and its estimated impact on costs, life expectancy, and cost-effectiveness (Structured abstract). 2007. Available at: <http://onlinelibrary.wiley.com/o/cochrane/celed/articles/NHSEED-22007008234/frame.html> [Accessed
4. Geisler BP, Egan BM, Cohen JT, Garner AM, Akehurst RL, Esler MD, et al. Cost-effectiveness and clinical effectiveness of catheter-based renal denervation for resistant hypertension. *Journal of the American College of Cardiology*. 2012;60(14):1271-7.
5. Marra C, Johnston K, Santschi V, Tsuyuki R. Cost-effectiveness of pharmacist intervention for managing hypertension in Canada. *Canadian Pharmacists Journal*. 2017;150(4):S72.
6. Saito I, Kobayashi M, Matsushita Y, Mori A, Kawasugi K, Saruta T. Cost-utility analysis of antihypertensive combination therapy in Japan by a Monte Carlo simulation model. *Hypertension research : official journal of the Japanese Society of Hypertension*. 2008;31(7):1373-83.
7. Tajeu GS, Mennemeyer S, Menachemi N, Weech-Maldonado R, Kilgore M. Cost-effectiveness of Antihypertensive Medication: Exploring Race and Sex Differences Using Data From the REasons for Geographic and Racial Differences in Stroke Study. *Medical care*. 2017;55(6):552-60.
